- 1 Title: Dbx1 pre-Bötzing complex interneurons comprise the core inspiratory oscillator for
- 2 breathing in adult mice
- 3 Authors: Nikolas C. Vann, Francis D. Pham, Kaitlyn E. Dorst, and Christopher A. Del Negro
- 4 Author affiliation: Department of Applied Science, The College of William and Mary,
- 5 Williamsburg, VA 23185
- 6 Nikolas C. Vann ORCID: 0000-0003-4139-0642
- 7 Francis D. Pham ORCID: 0000-0003-1082-8533
- 8 Kaitlyn Dorst ORCID: 0000-0002-5393-2608
- 9 Christopher A. Del Negro ORCID: 0000-0002-7848-8224
- 10 Corresponding author: Christopher A. Del Negro, Ph.D., Professor and Chair, Department of
- 11 Applied Science, Integrated Science Center, 540 Landrum Dr., The College of William and
- 12 Mary, Williamsburg, Virginia, 757-221-7808 (office), 757-221-2050 (fax), [cadeln@wm.edu](mailto:cadeln@wm.edu)
- 13 Conflict of interest: The authors declare no competing financial interests.
- 14 Acknowledgements: National Institutes of Health grant R01 HL104127 (PI: Del Negro)
- 15 supported this work.
- 16

## 17 **ABSTRACT**

18 The brainstem pre-Bötzinger complex (preBötC) generates inspiratory breathing rhythms, but  
19 which neurons comprise its rhythmogenic core? Dbx1-derived neurons may play the preeminent  
20 role in rhythm generation, an idea well founded at perinatal stages of development but not in  
21 adulthood. We expressed archaerhodopsin or channelrhodopsin in Dbx1 preBötC neurons in  
22 intact adult mice to interrogate their function. Prolonged photoinhibition slowed down or stopped  
23 breathing, whereas prolonged photostimulation sped up breathing. Brief inspiratory-phase  
24 photoinhibition evoked the next breath earlier than expected, whereas brief expiratory-phase  
25 photoinhibition delayed the subsequent breath. Conversely, brief inspiratory-phase  
26 photostimulation increased inspiratory duration and delayed the subsequent breath, whereas  
27 brief expiratory-phase photostimulation evoked the next breath earlier than expected. Because  
28 they govern the frequency and precise timing of breaths in awake adult mice with sensorimotor  
29 feedback intact, Dbx1 preBötC neurons constitute an essential core component of the  
30 inspiratory oscillator, knowledge directly relevant to human health and physiology.

## 31 **INTRODUCTION**

32 Inspiratory breathing movements in mammals originate from neural rhythms in the brainstem  
33 preBötzinger Complex (preBötC) (Feldman et al., 2013; Smith et al., 1991). Although the  
34 preBötC has been identified in a range of mammals including bats, moles, goats, cats, rabbits,  
35 rats, mice, and humans (Mutolo et al., 2002; Pantaleo et al., 2011; Ruangkittisakul et al., 2011;  
36 Schwarzacher et al., 1995, 2010; Smith et al., 1991; Tupal et al., 2014; Wenninger et al., 2004)  
37 its neuronal constituents remain imprecise. Competing classification schemes emphasize  
38 peptide and peptide receptor expression (Gray et al., 1999, 2001; Stornetta et al., 2003a; Tan et  
39 al., 2008) as well as a glutamatergic transmitter phenotype (Funk et al., 1993; Stornetta et al.,  
40 2003b; Wallen-Mackenzie et al., 2006) as cellular markers that define the preBötC  
41 rhythmogenic core.

42 Interneurons derived from precursors that express the homeodomain transcription factor Dbx1  
43 (i.e., Dbx1 neurons) also express peptides and peptide receptors associated with respiratory  
44 rhythmogenesis, and are predominantly glutamatergic. *Dbx1* knock-out mice die at birth of  
45 asphyxia and the preBötC never forms (Bouvier et al., 2010; Gray et al., 2010). In rhythmically  
46 active slice preparations from neonatal Dbx1 reporter mice, Dbx1 preBötC neurons discharge in  
47 bursts in phase with inspiration (Picardo et al., 2013), and their sequential laser ablation slows

48 and then stops respiratory motor output (Wang et al., 2014). These results obtained from  
49 perinatal mice suggest that Dbx1 neurons comprise the rhythmogenic preBötC core, i.e., the  
50 Dbx1 core hypothesis.

51 Nevertheless, in addition to their putatively rhythmogenic role, Dbx1 preBötC neurons also  
52 govern motor pattern. Hypoglossal motoneurons that maintain airway patency receive rhythmic  
53 synaptic drive from Dbx1 neurons within the preBötC and adjacent intermediate reticular  
54 formation (Revill et al., 2015; Song et al., 2016; Wang et al., 2014). In anesthetized  
55 vagotomized adult mice, photostimulation of Dbx1 preBötC neurons modulates inspiratory  
56 timing and its motor pattern, which is mediated in part by somatostatin-expressing (Sst) preBötC  
57 neurons (Cui et al., 2016), a large fraction of which are derived from Dbx1-expressing  
58 progenitors (Bouvier et al., 2010; Gray et al., 2010; Koizumi et al., 2016).

59 In adult animals, Dbx1 preBötC neurons serve non-respiratory roles as well. A subset that  
60 expresses Cadherin-9 (Cdh9) projects to the pontine locus coeruleus to influence arousal  
61 (Yackle et al., 2017). Collectively, the fractions of motor output-related (Sst-expressing) and  
62 arousal-related (Cdh9-expressing) Dbx1 neurons could account for 73% of Dbx1 neurons within  
63 the preBötC: up to 17% of Dbx1 preBötC neurons express Sst and 56% express Cdh9 with no  
64 overlap between Sst and Cdh9 expression (Bouvier et al., 2010; Cui et al., 2016; Gray et al.,  
65 2010; Yackle et al., 2017). That accounting would leave 27% of Dbx1 preBötC neurons  
66 exclusively rhythmogenic, if one assumes that all remaining Dbx1 neurons are dedicated to  
67 respiration and that single Dbx1 preBötC neurons cannot fulfill multiple duties. Therefore, while  
68 their rhythmogenic role is well established at perinatal stages of development (Bouvier et al.,  
69 2010; Gray et al., 2010), the contemporary studies recapped above from adult mice imply that  
70 rhythm generation may not be the principal function of Dbx1 preBötC neurons.

71 Here we reevaluate the inspiratory rhythmogenic role of Dbx1 preBötC neurons in adult mice  
72 with intact sensorimotor feedback. Using optogenetic technologies to photoinhibit or  
73 photostimulate Dbx1 neurons, we show that their perturbation affects breathing frequency and  
74 the precise timing of individual breaths within the breathing cycle, which are key properties of a  
75 core oscillator microcircuit. Other respiratory and non-respiratory roles notwithstanding, these  
76 data indicate that Dbx1 preBötC neurons constitute an essential core oscillator for inspiration.

## 77 RESULTS

### 78 ***ArchT activation hyperpolarizes Dbx1 preBötC neurons postsynaptically***

79 We illuminated the preBötC in transverse medullary slices from neonatal Dbx1;ArchT mice (the  
80 intersection of a *Dbx1*<sup>CreERT2</sup> driver mouse and a reporter featuring Cre-dependent  
81 archaerhodopsin [ArchT] expression) that spontaneously generate inspiratory rhythm and  
82 airway-related hypoglossal (XII) motor output. Light application (589 nm) to the preBötC  
83 bilaterally stopped rhythm and motor output at all light intensities (Figure 1 – figure supplement  
84 1A and B). Dbx1 preBötC neurons recorded in whole-cell patch-clamp hyperpolarized  $6.5 \pm 1.0$ ,  
85  $8.1 \pm 1.1$ , and  $11.0 \pm 2.5$  mV in response to light of increasing intensity (Figure 1A, cyan). We  
86 reapplied the highest intensity light in the presence of TTX, which hyperpolarized Dbx1 preBötC  
87 neurons by  $8.6 \pm 1.4$  mV (Figure 1A and B, cyan). Light-evoked hyperpolarization was  
88 commensurate before and after TTX (Mann-Whitney U,  $p = 0.2$ ,  $n_1 = 8$ ,  $n_2 = 3$ ), which suggests  
89 that ArchT hyperpolarizes Dbx1 preBötC neurons via direct postsynaptic effects.

90 In the same slices from neonatal Dbx1;ArchT mice, we illuminated the preBötC bilaterally while  
91 patch recording neighboring non-Dbx1 preBötC neurons. Baseline membrane potential in non-  
92 Dbx1 preBötC neurons responded negligibly to light, hyperpolarizing  $0.7 \pm 0.3$ ,  $1.1 \pm 0.5$ , and  
93  $1.1 \pm 0.6$  mV in response to light of increasing intensity (Figure 1A, magenta, and Figure 1 –  
94 figure supplement 1B). In TTX, light at the highest intensity hyperpolarized non-Dbx1 neurons  
95 by  $0.3 \pm 0.8$  mV (Figure 1A and B, magenta), which was indistinguishable from light-evoked  
96 hyperpolarization before TTX application (Mann-Whitney U,  $p = 0.2$ ,  $n_1 = 8$ ,  $n_2 = 4$ ). These  
97 results suggest that light-evoked cessation of inspiratory rhythm and motor output *in vitro* is  
98 largely attributable to direct postsynaptic effects on Dbx1 preBötC neurons rather than network  
99 disfacilitation, which would comparably affect Dbx1 as well as non-Dbx1 neurons in the preBötC  
100 and would be eliminated by TTX.

### 101 ***Photoinhibition of Dbx1 preBötC neurons attenuates breathing and resets inspiration***

102 Next we illuminated the preBötC bilaterally using fiberoptic implants (Figure 1C shows tracks of  
103 fiberoptics in post-hoc histology) in sedated adult Dbx1;ArchT mice, which reduced breathing in  
104 all instances (Figure 2A). In control conditions breathing frequency ( $f$ ) was typically  $\sim 3.5$  Hz,  
105 tidal volume ( $V_T$ ) was  $\sim 0.1$  ml, and minute ventilation (MV) was  $\sim 50$  ml/min. The lowest intensity  
106 light (6.8 mW) decreased  $f$  by 0.3 Hz (t-test,  $p = 0.05$ ,  $n = 6$ ), decreased  $V_T$  by 0.2 ml (but that

107 change was not statistically significant by t-test,  $p = 0.06$ ,  $n = 6$ ), and decreased MV by 9 ml/min  
108 (t-test,  $p = 0.01$ ,  $n = 6$ ) (Figure 2B).

109  $f$ ,  $V_T$ , and MV decreased to a greater extent in response to 8.6 and 10.2 mW intensity  
110 illumination (Figure 2A).  $f$  decreased by 1.2 and 2.0 Hz, respectively (t-test,  $p = 0.001$  and  $p =$   
111  $0.0001$ ,  $n = 6$ ). Apnea – no inspiratory effort – resulted in more than one-third of all trials at 10.2  
112 mW (i.e., 11 of 30 bouts, e.g., Figure 2A, bottom).  $V_T$  decreased in response to 8.6 and 10.2  
113 mW light in both cases by 0.03 ml (t-test,  $p = 0.04$  and  $p = 0.02$ ,  $n = 6$ ). MV decreased by 11  
114 and 20 ml/min, respectively (t-test, both  $p = 0.02$ ,  $n = 6$ ) (Figure 2B).

115 In comparison, sedated wild-type littermates subjected to the same protocol showed no light-  
116 evoked changes in breathing (Figure 2 – figure supplement 1A and 1B).

117 We repeated these experiments in Dbx1;ArchT mice while awake and unrestrained (Figure 2C).  
118 The lowest intensity light (6.8 mW) decreased  $f$  and  $V_T$  by 0.01 Hz and 0.03 ml, respectively  
119 (neither change was statistically significant by t-test,  $p = 0.06$  and  $0.07$ ,  $n = 5$ ). MV decreased  
120 significantly by 7.4 ml/min (t-test,  $p = 0.04$ ,  $n = 5$ ) (Figure 2D).

121 The effects on breathing were more profound when we illuminated at 8.6 and 10.2 mW (Figure  
122 2C).  $f$  decreased by 1.1 and 1.2 Hz, respectively (t-test,  $p = 0.002$  and  $p = 0.02$ ,  $n = 5$ ) and MV  
123 decreased by 22 and 32 ml/min, respectively (t-test,  $p = 0.04$  and  $p = 0.03$ ,  $n = 5$ ). One animal  
124 stopped breathing for ~4 s (i.e., apnea, Figure 2C, bottom trace). Although  $V_T$  decreased by  
125 0.05 and 0.15 ml, respectively, statistical hypothesis testing did not detect significant light-  
126 induced changes (t-test,  $p = 0.2$  and  $p = 0.08$ ,  $n = 5$ ), probably due to the high variability of  $V_T$  in  
127 awake animals (Figure 2D).

128 In comparison, awake unrestrained wild-type littermates showed no changes in breathing in  
129 response to light of any intensity (Figure 2 – figure supplement 1C and 1D).

130 Therefore, these data collectively show that ArchT-mediated Dbx1 preBötC neuron  
131 hyperpolarization reduces breathing up to and including apnea in sedated and awake intact  
132 mice.

133 Next we applied brief (100 ms) light pulses randomly during the breathing cycle, which we  
134 defined as spanning 0-360° (see Materials and Methods, Figure 3 inset). Brief photoinhibition of  
135 the preBötC early during inspiration ( $\Phi_{\text{Stim}}$  of 0-30°) caused a phase advance such that the

136 subsequent inspiration occurred earlier than expected ( $\Phi_{\text{Shift}} = -147 \pm 23^\circ$ ,  $p = 1e-6$ ,  $n = 4$ ) while  
137 shortening inspiratory time ( $T_i$ ) by almost half ( $\Delta T_i = 45 \pm 5\%$ ,  $p = 1e-6$ ,  $n = 4$ ) (Figure 3A<sub>1,2</sub> and  
138 A<sub>3</sub> top trace). Brief photoinhibition also evoked significant phase advances and reduced  $T_i$   
139 during the rest of inspiration ( $\Phi_{\text{Stim}}$  of 30-120°), but the magnitude of those changes  
140 monotonically decreased as  $\Phi_{\text{Stim}}$  approached the inspiratory-expiratory transition.

141 Brief photoinhibition did not perturb the system during the inspiratory-expiratory transition ( $\Phi_{\text{Stim}}$   
142 of 120-180°). During early expiration ( $\Phi_{\text{Stim}}$  of 180-210°), which is often referred to as post-  
143 inspiration (Anderson et al., 2016; Dutschmann et al., 2014) we observed the first significant  
144 phase delay such that the subsequent inspiration occurred later than expected in response to  
145 brief photoinhibition ( $\Phi_{\text{Shift}} = 32 \pm 7^\circ$ ,  $p = 0.006$ ,  $n = 4$ , Figure 3A<sub>1</sub> and A<sub>3</sub> bottom trace). Phase  
146 delays were consistently evoked during expiration ( $\Phi_{\text{Stim}}$  of 210-360°) with a maximum phase  
147 delay during late expiration ( $\Phi_{\text{Stim}}$  of 300-330°) ( $\Phi_{\text{Shift}} = 78 \pm 10^\circ$ ,  $p = 1e-6$ ,  $n = 4$ ). Brief  
148 photoinhibition during expiration did not affect  $T_i$ , which is a straightforward result because the  
149 inspiratory period had ended (Figure 3A<sub>2</sub>). Note, that  $\Delta T_i$  was statistically significant at  $\Phi_{\text{Stim}}$  of  
150 210-240°) but that change is not physiologically meaningful because the magnitude of the  
151 change is small and not part of a consistent trend in the phase-response curve.

152 The relationship between  $\Phi_{\text{Stim}}$  and the phase of the subsequent breath ( $\Phi_{N+1}$ , Figure 3 – figure  
153 supplement 1A<sub>1</sub>) closely resembled the relationship between  $\Phi_{\text{Stim}}$  and  $\Phi_{\text{Shift}}$  (Figure 3A<sub>1</sub>), which  
154 suggests that brief photoinhibition resets the phase of the oscillator.

155 In contrast to its effects on breathing phase ( $\Phi_{\text{Shift}}$  and  $\Phi_{N+1}$ ), brief photoinhibition had little effect  
156 on  $V_T$  throughout most of the respiratory cycle with changes of less than 10% across the entire  
157 respiratory cycle, except during early inspiration ( $\Phi_{\text{Stim}}$  of 0-30°, in which  $V_T$  decreased by  $23 \pm$   
158  $8\%$ ,  $p = 0.02$ ,  $n = 4$ ) and early expiration ( $\Phi_{\text{Stim}}$  of 150-180°, in which  $V_T$  increased by  $16 \pm 11\%$ ,  
159  $p = 0.01$ ,  $n = 4$ ) (Figure 3 – figure supplement 1A<sub>2</sub>). Despite the fact that two out of 12  
160 measurements pass the threshold for statistical significance, these data do not convincingly  
161 demonstrate that brief photoinhibition of Dbx1 preBötC neurons systematically influences  $V_T$  in  
162 sedated mice.

163 We repeated brief photoinhibition experiments in awake unrestrained Dbx1;ArchT mice. The  
164 plots of  $\Phi_{\text{Shift}}$ ,  $\Delta T_i$ ,  $\Phi_{N+1}$ , and  $\Delta V_T$  versus  $\Phi_{\text{Stim}}$  were qualitatively similar to the experiments in  
165 sedated mice (compare Figure 3A to 3B and Figure 3 – figure supplement 1A to 1B).

166 Photoinhibition during early inspiration ( $\Phi_{\text{Stim}}$  of 0-30°) caused a phase advance ( $\Phi_{\text{Shift}} = -86 \pm$

167 160°,  $p = 1e-5$ ,  $n = 4$ ). The first significant phase delay in the awake animal occurred when brief  
168 photoinhibition was applied during peak expiration ( $\Phi_{\text{Stim}}$  of 210-240°,  $\Phi_{\text{Shift}} = 68 \pm 15^\circ$ ,  $p = 1e-6$ ,  
169  $n = 4$ ).  $\Phi_{\text{Shift}}$  tended to increase as brief photoinhibition was applied at later points during the  
170 expiratory phase. The maximum phase delay occurred during late expiration ( $\Phi_{\text{Stim}}$  of 330-360°,  
171  $\Phi_{\text{Shift}} = 118 \pm 25^\circ$ ,  $p = 4e-5$ ,  $n = 4$ ) (Figure 3B<sub>1</sub> and B<sub>3</sub>). Brief photoinhibition decreased  $T_i$  by  
172 nearly one-third ( $\Delta T_i = 28 \pm 9\%$ ,  $p = 1e-5$ ,  $n = 4$ ) during early inspiration ( $\Phi_{\text{Stim}}$  of 0-30°) but had  
173 no significant effect at any other time during the cycle.

### 174 ***Photostimulation of Dbx1 preBötC neurons enhances breathing and modifies the timing*** 175 ***and magnitude of breaths***

176 We illuminated the preBötC unilaterally in sedated adult Dbx1;CatCh mice (the intersection of a  
177 *Dbx1*<sup>CreERT2</sup> driver mouse and a reporter featuring Cre- and Flp-dependent calcium translocating  
178 channelrhodopsin [CatCh] expression) following viral transduction in the preBötC with a  
179 synapsin-driven Flp recombinase. Using this double-stop intersectional approach, CatCh-EYFP  
180 expression was limited to the preBötC (Figure 1D). In control conditions  $f$  was typically ~3 Hz,  
181  $V_T$  was ~0.1 ml, and MV was ~50 ml/min. Bouts of blue light (473 nm) at three intensities  
182 significantly increased  $f$  by 0.8, 1.1, and 1.3 Hz, respectively (t-test,  $p = 0.03$ , 0.005, and 0.03,  $n$   
183 = 4). There were no significant effects on  $V_T$  or MV at any light intensity (Figure 4A and B).

184 We repeated these unilateral photostimulation experiments in Dbx1;CatCh mice while awake  
185 and unrestrained. Frequency increased by 1.6 Hz in response to light at the highest intensity  
186 (Figure 4C and D). There were no other notable changes in  $f$ ,  $V_T$ , or MV at any light intensity.

187 In wild type littermates, we observed no effects on breathing in either sedated or awake mice in  
188 response to light at any intensity (Figure 4 – figure supplement 1).

189 Therefore, these data collectively show that CatCh-mediated photostimulation of Dbx1 preBötC  
190 neurons selectively enhances breathing frequency in sedated and awake intact mice.

191 Next we applied brief (100 ms) light pulses at different time points during the breathing cycle.  
192 Unilateral illumination of the preBötC during inspiration caused a phase delay and increased  $T_i$ .  
193 The maximum phase delay occurred during peak inspiration ( $\Phi_{\text{Stim}}$  of 60-90°,  $\Phi_{\text{Shift}} = 125 \pm 18^\circ$ ,  $p$   
194 =  $1e-6$ ,  $n = 4$ ) (Figure 5A<sub>1</sub>) and coincided with the maximum  $\Delta T_i$  ( $29 \pm 7\%$ ,  $p = 1e-6$ ,  $n = 4$ )  
195 (Figure 5A<sub>2</sub>). Brief photostimulation caused a phase advance during the inspiratory-expiratory  
196 transition ( $\Phi_{\text{Stim}}$  of 90-120°) and throughout expiration ( $\Phi_{\text{Stim}} \geq 120^\circ$ ) without affecting  $T_i$ . The



197 maximum phase advance occurred during early expiration ( $\Phi_{\text{Stim}}$  of 150-180°,  $\Phi_{\text{Shift}} = -128 \pm 4^\circ$ ,  
198  $p = 1e-6$ ,  $n = 4$ ) (Figure 5A<sub>1</sub> and A<sub>3</sub>). The relationship between  $\Phi_{\text{Stim}}$  and the phase of the  
199 subsequent breath ( $\Phi_{\text{N}+1}$ , Figure 5 – figure supplement 1A<sub>1</sub>) mimicked the relationship between  
200  $\Phi_{\text{Stim}}$  and  $\Phi_{\text{Shift}}$  (Figure 5A<sub>1</sub>), which suggests that brief photostimulation resets the phase of the  
201 oscillator. We observed no effects of brief photostimulation on  $V_T$  (Figure 5 – figure supplement  
202 1A<sub>2</sub>).

203 We repeated brief photostimulation experiments in awake intact Dbx1;CatCh mice. The plots of  
204  $\Phi_{\text{Shift}}$  and  $\Delta T_i$  vs  $\Phi_{\text{Stim}}$  were qualitatively similar to those recorded in sedated mice (compare  
205 Figure 5B to 5A). Brief photostimulation during early and mid-inspiration ( $\Phi_{\text{Stim}}$  of 0-60°) caused  
206 a phase delay (maximum  $\Phi_{\text{Shift}} = 147 \pm 52$ ,  $p = 1e-5$ ,  $n = 4$ ) (Figure 5B<sub>1</sub>). We measured no  
207 phase shift for late inspiration ( $\Phi_{\text{Stim}}$  of 60-90°). The phasic effect of brief photostimulation  
208 changed sign around the inspiratory-expiratory transition ( $\Phi_{\text{Stim}} \geq 90^\circ$ ); brief photostimulation  
209 subsequently evoked breaths earlier than expected. We measured the maximum phase  
210 advance during early expiration ( $\Phi_{\text{Stim}}$  of 120-150°,  $\Phi_{\text{Shift}} = -159 \pm 9^\circ$ ,  $p = 1e-5$ ,  $n = 4$ ) (Figure  
211 5B<sub>1</sub>). The last statistically significant phase delay occurred during late expiration ( $\Phi_{\text{Stim}}$  of 270-  
212 300°,  $\Phi_{\text{Shift}} = -52 \pm 3^\circ$ ,  $p = 0.05$ ,  $n = 4$ ).

213 Brief photostimulation of Dbx1 preBötC neurons in awake intact mice also extended  $T_i$  during  
214 inspiration (Figure 5B<sub>2</sub>); the effect was even more pronounced than in sedated mice (Figure  
215 5A<sub>2</sub>). The maximum  $\Delta T_i$  occurred during early inspiration ( $\Phi_{\text{Stim}}$  of 0-30°) in which  $T_i$  increased  
216 by over half ( $56 \pm 14\%$ ,  $p = 1e-6$ ,  $n = 4$ ). The ability of brief photostimulation to extend  $T_i$   
217 decreased during the inspiratory phase (Figure 5B<sub>1</sub>) such that no significant effects occurred  
218 after  $\Phi_{\text{Stim}}$  exceeded 90°. The relationship between  $\Phi_{\text{Stim}}$  and  $\Phi_{\text{N}+1}$  illustrated a phase delay  
219 evoked by brief photostimulation during mid-inspiration ( $\Phi_{\text{Stim}}$  of 30-60°, Figure 5 – figure  
220 supplement 1A<sub>1</sub>), which partially recaps the relationship that was more pronounced in the plot of  
221  $\Phi_{\text{Shift}}$  vs.  $\Phi_{\text{Stim}}$  (Figure 5A<sub>1</sub>). We observed no relationship for  $\Delta V_T$  vs.  $\Phi_{\text{Stim}}$  (Figure 5 – figure  
222 supplement 1B<sub>2</sub>), as in the sedated mouse (Figure 5 – figure supplement 1B<sub>1</sub>).

223 These data are consistent photostimulus-induced resetting of the inspiratory oscillator, although  
224 the data are noisier in the awake adult, freely behaving mouse.



## 225 **DISCUSSION**

### 226 ***Role diversity challenges the Dbx1 core hypothesis***

227 The idea that Dbx1 preBötC neurons are inspiratory rhythmogenic has become generally well  
228 accepted, but it must be reevaluated given the expanding spectrum of non-rhythmogenic and  
229 non-respiratory functions attributed to this neuron class, particularly in adult animals.

230 Perinatally Dbx1 preBötC neurons generate rhythm and pattern. *Dbx1* knock-out mice do not  
231 breathe and form no recognizable preBötC (Bouvier et al., 2010; Gray et al., 2010), the site of  
232 inspiratory rhythmogenesis (Del Negro et al., 2018; Feldman and Del Negro, 2006; Feldman et  
233 al., 2013; Ramirez et al., 2016; Smith et al., 1991). Their selective destruction in a slice model of  
234 breathing (Funk and Greer, 2013) slows and then stops the rhythm, evidence of their  
235 rhythmogenic role, while also attenuating airway-related XII motor output (Wang et al., 2014)  
236 because of Dbx1 premotor neurons in the preBötC that drive XII (Revill et al., 2015; Wang et al.,  
237 2014) as well as phrenic motoneurons (Wu et al., 2017).

238 This theme continues in adult mice. Sst-expressing preBötC neurons, ~17% of the Dbx1-  
239 derived population, appear to lack rhythmogenic function but rather shape motor output pattern  
240 (Cui et al., 2016), q.v., (Koizumi et al., 2016). More than half (56%) of Dbx1 preBötC neurons  
241 characterized by Cdh9 expression lack respiratory rhythmicity but project to the locus coeruleus  
242 and putatively influence arousal (Yackle et al., 2017). If we assume that non-Sst and non-Cdh9  
243 Dbx1 neurons have respiratory functions, and that individual neurons do not fulfill multiple  
244 duties, then these statistics suggest that not more than 27% of Dbx1 preBötC neurons in adult  
245 mice are exclusively rhythmogenic.

### 246 ***Photoinhibition and photostimulation demonstrate Dbx1 preBötC neurons influence*** 247 ***rhythm and pattern***

248 Sustained photoinhibition caused graded frequency decreases including apnea, which are  
249 evidence that Dbx1 neurons form the core oscillator. However, photoinhibition also decreased  
250  $V_T$ , indicating that Dbx1 neurons also govern breath size, i.e., motor pattern. We reported  
251 qualitatively similar data in (Vann et al., 2016) but the effects were more mild because of the  
252 weaker archaerhodopsin variant available at the time. Dbx1 neurons that influence airway and  
253 pump-related motor function have been analyzed in detail (Cui et al., 2016; Revill et al., 2015;  
254 Wang et al., 2014; Wu et al., 2017). Here we limit our comments to acknowledging those motor-

255 related roles, and we concentrate on analyzing the role of Dbx1 preBötC neurons in  
256 rhythmogenesis.

257 Sustained photostimulation approximately doubled the breathing rate from ~3.5 to 7 Hz. In  
258 contrast, Baertsch and colleagues (Baertsch et al., 2018) reported minor (~10%) frequency  
259 changes in vagus intact mice in response to sustained photostimulation. These two results are  
260 not discrepant, even if they appear to be at face value. We were able to evoke higher  
261 frequencies in our experiments most likely due to the accelerated response time, enhanced light  
262 sensitivity, larger voltage responses evoked by photoactivated CatCh compared to ChR2  
263 (Kleinlogel et al., 2011), and the fact that we applied laser strengths up to 10.2 mW whereas  
264 Baertsch *et al.* purposely limited their pulses to 7 mW or less (Baertsch et al., 2018). Those  
265 authors showed that phasic synaptic inhibition critically influences breathing frequency and we  
266 do not disagree. We purposely did not vagotomize our mice to preserve phasic synaptic  
267 inhibition and thus high breathing frequencies are possible during photostimulation.

#### 268 ***Phase-response experiments demonstrate that Dbx1 preBötC neurons are rhythmogenic***

269 If Dbx1 preBötC neurons are inspiratory rhythmogenic, then transiently stimulating them should  
270 evoke inspiratory breaths at any point in the breathing cycle except, potentially, during the post-  
271 inspiratory (early expiratory) refractory period identified *in vitro* (Guerrier et al., 2015; Kottick and  
272 Del Negro, 2015) and in vagotomized mice *in vivo* (Baertsch et al., 2018). We evoked  
273 inspiratory breaths at all points during the respiratory cycle without evidence of a refractory  
274 period. Brief photostimulation during inspiration prolonged it (i.e., increased  $T_i$ ) and delayed the  
275 next cycle (i.e., a phase delay). The straightforward interpretation is that CatCh-mediated inward  
276 current augments recurrent excitation thus prolonging inspiratory burst duration. Overexcited  
277 rhythmogenic neurons require more time to recover, which lengthens cycle time and delays the  
278 subsequent inspiration.

279 We observed that photostimulation at any other point in the cycle evoked inspiration earlier than  
280 expected, a phase advance, but did not otherwise modify inspiration. In contrast to a prior  
281 report, brief photostimulation did not evoke phase advances during early expiration (Alsaifi et  
282 al., 2015). But in that experimental context a synapsin promoter drove channelrhodopsin  
283 expression in both excitatory and inhibitory preBötC neurons. Because preBötC rhythmogenesis  
284 depends on recurrent excitation, and the network is at the nadir of its excitability during early  
285 expiration (Del Negro et al., 2018; Feldman and Kam, 2015; Ramirez et al., 2016),

286 photostimulation of inhibitory neurons in concert with excitatory neurons would be less effective  
287 to evoke inspiratory bursts during early expiration.

288 Selective photostimulation of excitatory Dbx1-derived preBötC neurons should evoke phase  
289 advances during early expiration, and it does. Cui *et al.* (2016) photostimulated excitatory Dbx1  
290 neurons and evoked phase advances of up to  $\sim 72^\circ$  during most of expiratory phase, except  
291 during the inspiratory-expiratory transition. We evoked more substantial phase advances of 90-  
292  $150^\circ$  during the early expiration. These results are not in conflict, but key methodological  
293 differences may explain the discrepancy. Cui *et al.* anesthetized their mice and applied a  
294 maximum laser power of 7 mW to activate channelrhodopsin, whereas we used awake or lightly  
295 sedated mice and applied a maximum laser power of 10.2 mW to activate the channelrhodopsin  
296 variant CatCh. Assuming that the fiberoptic appliances in both studies equally attenuate laser  
297 power from box to preBötC, then the larger phase advances we evoked during early expiration  
298 could be attributable to a higher excitability level of the preBötC in the unanesthetized (or lightly  
299 sedated) mice, higher laser power, as well as the accelerated response time, enhanced light  
300 sensitivity, and larger voltage responses evoked by photoactivated CatCh compared to ChR2  
301 (Kleinlogel *et al.*, 2011).

302 Brief photoinhibition of Dbx1 preBötC neurons during inspiration shortened it (i.e., decreased  $T_i$ )  
303 and initiated the next cycle earlier than expected, a phase advance. We infer that  
304 hyperpolarizing rhythmogenic neurons checks the recurrent excitation process, which impedes  
305 but does not prevent inspiration. Nevertheless, the evoked breath is shorter in duration. preBötC  
306 neurons do not overexcite or become refractory, which facilitates the onset of the next cycle,  
307 hence the phase advance. That mechanism, here evoked by ArchT, mirrors the role of  
308 endogenous phasic synaptic inhibition, which curbs recurrent excitation to limiting inspiratory  
309 activity and facilitate inspiratory-expiratory phase transition (Baertsch *et al.*, 2018). We found  
310 that photoinhibition during expiration consistently caused a phase delay, which indicates  
311 hyperpolarization of Dbx1 preBötC neurons resets recurrent excitation and thus prolongs the  
312 interval until the next inspiration.

313 Our interpretations of the phase-response experiments, both photostimulation and  
314 photoinhibition, are consistent with Dbx1 preBötC neurons having direct temporal control over  
315 inspiration as well as post-inspiration and the expiratory interval. That conclusion may seem  
316 overly broad considering, first, that the preBötC is the acknowledged inspiratory oscillator and,  
317 second, that oscillator microcircuits for post-inspiration (the postinspiratory complex, PiCo,

318 Anderson et al., 2016) and expiration (the lateral parafacial group, pFL, Huckstepp et al., 2016,  
319 2015; Pagliardini et al., 2011) also exist. Nevertheless, the preBötC plays a dominant role in  
320 organizing all phases of breathing by entraining the other oscillators in intact mice, and in  
321 reduced preparations that retain PiCo and pFL (Del Negro et al., 2018; Moore et al., 2013;  
322 Ramirez et al., 2016). Therefore, the present data are consistent with Dbx1 preBötC  
323 interneurons constituting the oscillator core for inspiration and the central organizer for  
324 breathing.

### 325 ***Could optogenetic perturbation of inputs to the preBötC modulate breathing?***

326 The intersectional mouse genetics in Dbx1;ArchT mice leads to fusion protein expression in  
327 Dbx1-derived cells throughout the neuraxis. Therefore, preBötC illumination inhibits constituent  
328 interneurons but also axons of passage and the axon terminals of Dbx1 neurons from remote  
329 locations (Ruangkittisakul et al., 2014) that could disfacilitate the preBötC. If disfacilitation were  
330 primarily modulating preBötC activity in Dbx1;ArchT mice, then light-evoked hyperpolarization  
331 should be commensurate in non-Dbx1 neurons (which do not express ArchT) and Dbx1  
332 neurons; and, TTX should block it in both cases. However, non-Dbx1 neurons hyperpolarized  
333 ~1 mV in response to maximum illumination whereas Dbx1 neurons hyperpolarized ~11 mV,  
334 and TTX did not notably affect either response. We conclude that direct postsynaptic  
335 hyperpolarization of Dbx1 preBötC neurons, rather than a reduction of tonic excitatory drive, is  
336 the predominant effect of preBötC illumination in Dbx1;ArchT mice.

337 Light-evoked breathing changes in Dbx1;CatCh mice cannot be explained by photostimulation  
338 of axon terminals and axons of passage that originate outside of, but synapse within, the  
339 preBötC. We used double-stop technology to limit CatCh expression to Dbx1-derived neurons  
340 (not glia, see below), whose somas reside in the preBötC or directly adjacent sites including the  
341 Bötzing complex of inhibitory neurons (Ezure et al., 2003; Tanaka et al., 2003), and the rostral  
342 ventral respiratory group (Dobbins and Feldman, 1994; Ellenberger and Feldman, 1990; Gaytán  
343 et al., 2002) of excitatory phrenic premotor neurons. If Dbx1-derived expiratory neurons in the  
344 Bötzing complex exist (which has not been demonstrated), then their photostimulation would  
345 depress breathing (Janczewski et al., 2013; Marchenko et al., 2016), the opposite of what we  
346 measured. If photostimulation affected Dbx1 phrenic premotor neurons in the rostral ventral  
347 respiratory group (Wu et al., 2017), then that would enhance the magnitude of inspiratory  
348 breaths, but not the inspiratory timing circuits in the preBötC. Sustained photostimulation  
349 experiments only enhanced breathing frequency and never  $V_T$ , which diminishes the likelihood

350 that our protocols influenced Dbx1-derived phrenic premotoneurons. Thus, this caveat is  
351 unlikely to affect our primary conclusions regarding rhythmogenesis.

### 352 ***Effects on Dbx1-derived glia in the preBötC***

353 Dbx1-expressing precursor cells develop into neurons and glia (Bouvier et al., 2010; Gray et al.,  
354 2010; Kottick et al., 2017; Ruangkittisakul et al., 2014) but optogenetic perturbation of glia is  
355 unlikely to have influenced the present results. First, we consider photoinhibition. Astrocytes  
356 support excitatory synaptic function in the preBötC (Hülsmann et al., 2000), but that role is  
357 metabolic in nature and light-evoked hyperpolarization would not preclude it. Calcium excitability  
358 and gliotransmission, which could be affected by photoinhibition, pertain to purinergic  
359 modulation and hypoxic challenges to the preBötC (Angelova et al., 2015; Funk et al., 2015;  
360 Huxtable et al., 2010; Rajani et al., 2017), but are less relevant factors governing the basal  
361 breathing state, which is the baseline for our experiments.

362 Photostimulation experiments unambiguously identify neurons as the cellular population that  
363 forms the core inspiratory oscillator. CatCh expression was induced following Cre/Lox and  
364 Frt/Flp recombination. We used a synapsin promoter to express Flp locally in the preBötC so  
365 only Dbx1 neurons would be transfected and express CatCh.

366 ArchT expression is selectively (but not exclusively) limited to neurons by the timing of  
367 tamoxifen administration. Inducing Cre/lox recombination in pregnant *Dbx1*<sup>CreERT2</sup> mice at E9.5  
368 reduces ArchT expression in glia to ~40%, whereas ArchT expression in neurons remains  
369 above 90% (Kottick et al., 2017), which increases our confidence that photoinhibition largely  
370 affects neurons (not glia) and that neurons are the predominate rhythmogenic constituents and  
371 most parsimonious explanation for the light-induced changes in breathing.

### 372 ***Size of the Dbx1 core oscillator***

373 Up to 73% of Dbx1 preBötC neurons serve non-rhythmogenic functions: 56% influence arousal  
374 (Yackle et al., 2017) and 17% influence motor pattern (Cui et al., 2016), which accounts nearly  
375 three-quarters of the Dbx1 population in the preBötC. What implications does that have for the  
376 composition and size of the inspiratory core oscillator whose constituent interneurons are Dbx1-  
377 derived too?

378 Dbx1-Cdh9 preBötC neurons were certainly photoinhibited and photostimulated in our  
379 experiments. However, those neurons influence behavioral state (e.g., eupnea, grooming,  
380 exploring, sniffing, etc.) rather than cycle-to-cycle breathing dynamics. We applied optogenetic

381 perturbations only during eupnea, not during grooming or active movement, to control for  
382 behavioral shifts. Given that Dbx1-Cdh9 neurons are either weakly or not rhythmic (Yackle et  
383 al., 2017), briefly perturbing them would not influence the phase-response relationships, and  
384 thus would not confound our interpretation that Dbx1 preBötC neurons (even if a limited fraction  
385 of them) comprise the core oscillator.

386 Illumination of Sst-expressing Dbx1 neurons could be responsible for the decreases in  $V_T$  and  
387 apneas we report during sustained photoinhibition. In general, perturbations of Sst-expressing  
388 preBötC neurons affect breathing motor pattern in vagotomized and non-vagotomized adult  
389 mice (Cui et al., 2016; Koizumi et al., 2016); those effects are strong enough to completely stop  
390 breathing movements in intact adult rats (Tan et al., 2008). Our experiments would only impact  
391 neurons that are both Dbx1-derived and Sst-expressing, thus a smaller population than Tan *et*  
392 *al.* (2008) manipulated. Nevertheless, to the extent that photoinhibition decreased breath  
393 magnitude and caused apnea, we attribute in part to direct effects on pattern-related Sst-  
394 expressing Dbx1-derived preBötC neurons that are either premotor part of a larger pattern-  
395 generating system (Cui et al., 2016; Revill et al., 2015; Wu et al., 2017).

396 If Cdh9 and Sst subpopulations of Dbx1 preBötC neurons are independent of the core  
397 respiratory oscillator, then only a small fraction (~27%) of Dbx1 neurons are available for  
398 rhythmogenesis. Dbx1 neurons that comprise the preBötC core number approximately 600  
399 (Kottick et al., 2017; Wang et al., 2014). If one excludes Cdh9 and Sst neurons from this  
400 estimation, then as few as 160 Dbx1 preBötC neurons would remain for rhythmogenesis (we  
401 assume subpopulations serve one function). Can such a small number of interneurons comprise  
402 the inspiratory core oscillator?

403 Holographic photolysis of caged glutamate onto 4-9 preBötC neurons evokes inspiratory motor  
404 output *in vitro* (Kam et al., 2013). This type of stimulation would affect Dbx1-Cdh9 neurons that  
405 are weakly or non-rhythmic (Kam et al., 2013; Yackle et al., 2017) as well as inhibitory preBötC  
406 neurons (Kuwana et al., 2006; Morgado-Valle et al., 2010; Winter et al., 2009) so it may  
407 overestimate the minimum number of activated preBötC neurons needed to evoke inspiratory  
408 bursts. Regardless, a reasonable conclusion is that stimulating relatively small numbers of  
409 preBötC neurons are capable of inducing inspiratory burst cycles, which lends credence to the  
410 notion that a small subfraction of Dbx1 preBötC neurons could be rhythmogenic in the midst of a  
411 potentially larger population of non-rhythmogenic (both pattern-generating and non-respiratory)  
412 preBötC neurons.



413 Glutamatergic preBötC neurons not derived from Dbx1-expressing precursors may also  
414 comprise part of the core oscillator (Baertsch et al., 2018; Koizumi et al., 2016). We cannot  
415 precisely estimate the size of that subpopulation but we expect that it will be small based on the  
416 small fraction of preBötC neurons that express Vglut2 but not Dbx1 (Bouvier et al., 2010; Gray  
417 et al., 2010).

#### 418 ***Dbx1 core hypothesis***

419 The rhythmogenic subset of Dbx1 preBötC interneurons may be small, perhaps as little as 27%  
420 of the total Dbx1 population, but their outsize contribution to rhythmogenesis is unmistakable  
421 given the robust effects of sustained and transient photoinhibition and photostimulation  
422 demonstrated here, and by prior reports (Alsaifi et al., 2015; Cui et al., 2016; Koizumi et al.,  
423 2016). Therefore, whatever else Dbx1 preBötC neurons do – influence motor pattern and  
424 behavioral state – they certainly comprise the inspiratory core oscillator. Two key challenges  
425 going forward will be, first, to quantify the proportion of the rhythmogenic preBötC core that is  
426 non-Dbx1-derived, and second, to discriminate either on the basis of genetic or other markers,  
427 rhythmogenic from non-rhythmogenic Dbx1 neurons.

## 428 **MATERIALS AND METHODS**

### 429 ***Mice***

430 The Institutional Animal Care and Use Committee at The College of William and Mary approved  
431 these protocols. Female mice that express tamoxifen-sensitive Cre recombinase in *Dbx1*-  
432 derived progenitor cells, i.e., *Dbx1*<sup>CreERT2</sup> (Ruangkittisakul et al., 2014), available at Jax (strain  
433 028131, Jackson Laboratories, Bar Harbor, ME, USA), were mated with males from two  
434 different reporter strains. The first reporter strain expresses an ArchT-EGFP tagged with  
435 EGFP fusion protein (ArchT-EGFP) in a Cre-dependent manner from the endogenous  
436 *Gt(ROSA)26Sor* locus (Allen Institute nomenclature, Ai40D; Jax strain #021188,). The second  
437 reporter strain features *Frt*- and *LoxP*-flanked STOP cassettes followed by a fusion gene coding  
438 for calcium translocating channelrhodopsin and EYFP (CatCh-EYFP), which is expressed  
439 following Cre- and Flp-mediated recombination (Allen Institute nomenclature, Ai80D; Jax strain  
440 #025109). We administered tamoxifen to pregnant dams (22.5 mg/kg) at embryonic day 9.5 to  
441 maximize neuronal expression and minimize glial expression (Kottick et al., 2017). *Dbx1*;ArchT  
442 or *Dbx1*;CatCh mice were distinguished from wildtype (WT) littermates, which lack EGFP or



443 EYFP, via post-hoc histology. Therefore, WT littermates formed a control group whose  
444 constituent members were unknown to the experimenter.

#### 445 ***Brainstem slices***

446 Neonatal Dbx1;ArchT mice (0-4 days old) were anesthetized via hypothermia, decerebrated,  
447 and then dissected in 4° C artificial cerebrospinal fluid (aCSF) containing (in mM): 124 NaCl, 3  
448 KCl, 1.5 CaCl<sub>2</sub>, 1 MgSO<sub>4</sub>, 25 NaHCO<sub>3</sub>, 0.5 NaH<sub>2</sub>PO<sub>4</sub>, and 30 dextrose aerated continually with  
449 carbogen (95% O<sub>2</sub> and 5% CO<sub>2</sub>) at pH 7.4. The isolated neuraxes were glued to an agar block  
450 and mounted rostral side up in the vise of a vibratome. We cut the neuraxes in the transverse  
451 plane to obtain a single 500-µm-thick section containing the preBötC as well as the hypoglossal  
452 (XII) cranial motor nucleus and its rostral nerve rootlets. The anatomical criteria for isolating the  
453 preBötC in rhythmically active slices from neonatal Dbx1-reporter mice are detailed in a series  
454 of open access atlases (Ruangkittisakul et al., 2014). Slices were anchored using a silver wire  
455 grid in a recording chamber on a fixed-stage upright physiology microscope. We perfused the  
456 slice with aCSF at 27° C (2 ml/min) and elevated the K<sup>+</sup> concentration to 9 mM. Inspiratory  
457 motor output was recorded from the XII nerve rootlets using a differential amplifier (gain 2000x)  
458 and a band-pass filter (300-1000 Hz). Nerve root output was full-wave rectified and smoothed  
459 for display.

460 We identified Dbx1 neurons under epifluorescence via EGFP expression and then performed  
461 whole-cell patch-clamp recordings under visual control. Patch pipettes with tip resistance of 4-6  
462 MΩ were fabricated from capillary glass (1.50 mm outer diameter, 0.86 mm inner diameter) and  
463 filled with solution containing (in mM): 140 potassium gluconate, 5 NaCl, 0.1 EGTA, 10 HEPES,  
464 2 Mg-ATP, and 0.3 Na<sub>3</sub>-GTP. Alexa 568 hydrazide dye was added to the patch-pipette solution  
465 (50 µM, Invitrogen, Carlsbad, CA, USA) as a color contrast to EGFP following whole-cell  
466 dialysis. Membrane potential was amplified (100x) and low-pass filtered (1 kHz) using a patch-  
467 clamp amplifier (EPC10, HEKA Elektronik, Holliston, MA, USA) and digitally acquired at 4 kHz  
468 (PowerLab 4/30, AD Instruments, Colorado Springs, CO, USA).

#### 469 ***Virus injection and fiber optic implantation***

470 We anesthetized adult Dbx1;ArchT and Dbx1;CatCh (aged 8-20 weeks) mice via intraperitoneal  
471 injection of ketamine (100 mg/kg) and xylazine (10 mg/kg) and performed aseptic surgeries in  
472 the prone position using a stereotaxic frame. After exposing the skull, we performed either one

473 (Dbx1;CatCh mice) or two (Dbx1;ArchT mice) 0.5-mm-diameter craniotomies in the range 6.95  
474 to 7.07 mm posterior to bregma and 1.1 to 1.3 mm lateral to the midline suture.

475 In Dbx1;CatCh mice, we unilaterally injected an adeno-associated virus (AAV) immediately prior  
476 to fiber optic implantation to induce Flp-mediated recombination. We loaded an ultrafine,  
477 microvolume syringe (Neuros series, Hamilton, Reno, NV) with 120  $\mu$ l of AAV-eSyn-FLPo (titer  
478  $10^{13}$  vg/ml, Vector Biolabs, Malvern, PA, USA). The syringe was lowered at 10  $\mu$ m/s through the  
479 cerebellum and the virus was injected at the target site at approximately 60 nl/min. The syringe  
480 remained in place for 10 min before being retracted at 10  $\mu$ m/s.

481 Both Dbx1;ArchT and Dbx1;CatCh mice were equipped with fiber optic appliances constructed  
482 by joining 1.27-mm-diameter ceramic ferrules (Precision Fiber Products, Milptas, CA, USA) with  
483 105- $\mu$ m-diameter 0.22 numerical aperture (NA) multimode fibers (Thorlabs, Newton, NJ, USA).  
484 We implanted fiber optic appliances bilaterally in Dbx1;ArchT mice and unilaterally in  
485 Dbx1;CatCh mice at a depth of 5.5 to 5.9 mm from bregma, which were secured with a  
486 cyanoacrylate adhesive (Loctite 3092, Henkel Corp., Rocky Hill, CT, USA). Dbx1;ArchT animals  
487 recovered for a minimum of 10 days before any further experimentation. Dbx1;CatCh mice  
488 recovered for a minimum of 21 days before further experimentation.

#### 489 ***Breathing measurements***

490 After anesthetizing mice using 2% isoflurane we connected the ferrules of Dbx1;ArchT mice to a  
491 589-nm laser (Dragon Lasers, Changchun, China). The ferrule of Dbx1;CatCh mice was  
492 connected to a 473-nm laser (Dragon Lasers). Mice recovered from isofluorane anesthesia for  
493 ~1 hr, and then we measured breathing behavior using a whole body plethysmograph (Emka  
494 Technologies, Falls Church, VA, USA) that allowed for fiberoptic illumination in a sealed  
495 chamber.

496 In a separate session, these same mice were lightly sedated via intraperitoneal ketamine  
497 injections (15 mg/kg minimum dose), which we titrated as needed to reduce limb movements  
498 but retain toe-pinch and blink reflexes. The maximum aggregate dose was limited to 50 mg/kg.  
499 Mice were fitted with a modified anesthesia mask (Kent Scientific, Torrington, CT, USA) to  
500 measure breathing.

501 We applied a circuit of positive pressure, with balanced vacuum, to continuously flush the  
502 plethysmograph with breathing air. The plethysmograph and the mask were connected to a 1-

503 liter respiratory flow head and differential pressure transducer that measured airflow; positive  
504 airflow reflects inspiration in all cases. Analog breathing signals were digitized at 1 kHz  
505 (PowerLab).

### 506 ***Optogenetic protocols***

507 We applied 5 s bouts of light (either 473 or 589 nm) to Dbx1;ArchT and Dbx1;CatCh mice at  
508 graded intensities of 6.8, 8.6, and 10.2 mW. All ferrules were tested with a power meter prior to  
509 implantation to verify that illumination intensity did not vary more than 0.1 mW from the specified  
510 values. Bouts of light application were separated by a minimum interval of 30 s. We also applied  
511 100 ms light pulses at a fixed intensity of 10.2 mW. We exposed each mouse to 85-200 pulses  
512 spaced at random intervals of between 1 and 5 s.

513 We applied 2 s bouts of 589-nm light (at the same intensities listed above) to rhythmically active  
514 slices. The fiberoptics were targeted to selectively illuminate the preBötC bilaterally but not the  
515 adjacent reticular formation.

### 516 ***Data analyses***

517 The airflow signal was band-pass filtered (0.1-20 Hz) and analyzed using LabChart 8 software  
518 (AD Instruments), which computes airflow (units of ml/s), respiratory rate (i.e., frequency,  $f$ ,  
519 units of Hz), tidal volume ( $V_T$ , units of ml), inspiratory time ( $T_i$ ), and minute ventilation (MV, units  
520 of ml/min). We computed statistics using GraphPad Prism 6 (La Jolla, CA, USA) and R: The  
521 Project for Statistical Computing (R, The R Foundation, Vienna, Austria) and prepared figures  
522 using Adobe Illustrator (Adobe Systems Inc., San Jose, CA, USA), GraphPad Prism 6, and  
523 IGOR Pro 6 (Wavemetrics, Lake Oswego, OR, USA). We analyzed the experiments in which 5 s  
524 light pulses were applied to the preBötC using paired t-tests, specifically comparing mean  $f$ ,  $V_T$ ,  
525 and MV for control and illumination conditions at three different light intensity levels (i.e., at each  
526 laser strength tested, the pre-illumination ventilation serves as its own control).

527 We analyzed phase-response relationships of the breathing cycles perturbed by 100 ms-  
528 duration light pulses (see Figure 3C inset). The expected cycle period was measured from the  
529 unperturbed cycle immediately before the light pulse, which was defined as spanning 0-360°  
530 ( $\Phi_{\text{Expected}}$ ). Cycle times were measured from the start of inspiration in one breath to the start of  
531 inspiration of the subsequent breath. For perturbed cycles, 100-ms light pulses were applied at  
532 random time points spanning the inspiration and expiration to test for phase shifts.  $\Phi_{\text{Stim}}$  marks

533 the phase at which the light pulse occurred. The induced cycle period ( $\Phi_{\text{Induced}}$ ) was measured  
534 from the perturbed cycle. The perturbation of breathing phase,  $\Phi_{\text{Shift}}$ , was defined as the  
535 difference between  $\Phi_{\text{Induced}}$  and  $\Phi_{\text{Expected}}$ . We calculated change in  $V_T$  and  $T_i$  in the perturbed  
536 breath compared to the expected breath normalized to the expected breath (referred to as,  $\Delta V_T$   
537 and  $\Delta T_i$ , respectively). Further, we calculated the phase shift of the breath following the  
538 perturbed breath (i.e., the cycle after  $\Phi_{\text{Induced}}$ ) also with respect to  $\Phi_{\text{Expected}}$ ; we refer to the phase  
539 of the subsequent breath  $\Phi_{N+1}$ . Measurements of  $\Phi_{\text{Shift}}$ ,  $\Delta V_T$ ,  $\Delta T_i$ , and  $\Phi_{N+1}$  are all linked to a  
540 particular  $\Phi_{\text{Stim}}$  within the interval 0-360°. To analyze group data we sorted  $\Phi_{\text{Stim}}$  into 12 equally  
541 sized 30° bins. We computed the mean and standard deviation (SD) for  $\Phi_{\text{Shift}}$ ,  $\Delta V_T$ ,  $\Delta T_i$ , and  $\Phi_{N+1}$   
542 within each bin, which we then plotted in phase-response curves along with values calculated  
543 from wild type littermates. A Tukey's HSD to test was used to evaluate how unlikely it would  
544 have been to obtain mean  $\Phi_{\text{Shift}}$ ,  $\Delta V_T$ ,  $\Delta T_i$ , and  $\Phi_{N+1}$  for each bin if the optogenetic perturbations  
545 had commensurate effects on Dbx1;ArchT (or Dbx1;CatCh) mice and wild type littermates.

## 546 **Histology**

547 After experimentation we verified in all animals that fiber optic tips were within 500  $\mu\text{m}$  of the  
548 dorsal preBötC border, which could be identified via well-established anatomical criteria in  
549 combination with either ArchT-EGFP or CatCh-EYFP fusion protein expression in reporter mice  
550 (Figure 1C). We administered a lethal dose of pentobarbital (100 mg/kg i.p.) and then  
551 transcardially perfused the mice with 1x PBS followed by 4% PFA in PBS. The neuraxes were  
552 removed and post-fixed overnight in 4% PFA, and later sliced in 50- $\mu\text{m}$  contiguous transverse  
553 sections using a vibratome. Free-floating sections were stained using NeuroTrace 530/615 red  
554 fluorescent nissl stain (Invitrogen) for 1 hr, rinsed in PBS and then cover-slipped using  
555 Vectashield (Vector Labs, Burlingame, CA, USA). Tissue sections were visualized using bright-  
556 field and confocal microscopy. Images were arranged as mosaics and brightness and contrast  
557 were adjusted uniformly across the entire ensemble image using the public domain software  
558 package ImageJ. Images were not manipulated in any other way.

## 559 **REFERENCES**

- 560 Alsaifi, Z., Dickson, C.T., and Pagliardini, S. (2015). Optogenetic excitation of preBötzingen  
561 complex neurons potently drives inspiratory activity in vivo. *J. Physiol.* n/a-n/a.
- 562 Anderson, T.M., Garcia, A.J., Baertsch, N.A., Pollak, J., Bloom, J.C., Wei, A.D., Rai, K.G., and  
563 Ramirez, J.-M. (2016). A novel excitatory network for the control of breathing. *Nature* 536, 76–  
564 80.

- 565 Angelova, P.R., Kasymov, V., Christie, I., Sheikhabahaei, S., Turovsky, E., Marina, N., Korsak,  
566 A., Zwicker, J., Teschemacher, A.G., Ackland, G.L., et al. (2015). Functional Oxygen Sensitivity  
567 of Astrocytes. *J. Neurosci. Off. J. Soc. Neurosci.* 35, 10460–10473.
- 568 Baertsch, N.A., Baertsch, H., and Ramirez, J.M. (2018). The interdependence of excitation and  
569 inhibition for the control of dynamic breathing rhythms. *Press*.
- 570 Bouvier, J., Thoby-Brisson, M., Renier, N., Dubreuil, V., Ericson, J., Champagnat, J., Pierani, A.,  
571 Chédotal, A., and Fortin, G. (2010). Hindbrain interneurons and axon guidance signaling critical  
572 for breathing. *Nat. Neurosci.* 13, 1066–1074.
- 573 Cui, Y., Kam, K., Sherman, D., Janczewski, W.A., Zheng, Y., and Feldman, J.L. (2016). Defining  
574 preBötzinger Complex Rhythm- and Pattern-Generating Neural Microcircuits In Vivo. *Neuron*  
575 91, 602–614.
- 576 Del Negro, C.A., Funk, G.D., and Feldman, J.L. (2018). Breathing matters. *Nat Rev Neurosci.*
- 577 Dobbins, E.G., and Feldman, J.L. (1994). Brainstem network controlling descending drive to  
578 phrenic motoneurons in rat. *J. Comp. Neurol.* 347, 64–86.
- 579 Dutschmann, M., Jones, S.E., Subramanian, H.H., Stanic, D., and Bautista, T.G. (2014).  
580 Chapter 7 - The physiological significance of postinspiration in respiratory control. In *Progress in*  
581 *Brain Research*, G. Holstege, C.M. Beers, and H.H. Subramanian, eds. (Elsevier), pp. 113–130.
- 582 Ellenberger, H.H., and Feldman, J.L. (1990). Brainstem connections of the rostral ventral  
583 respiratory group of the rat. *Brain Res.* 513, 35–42.
- 584 Ezure, K., Tanaka, I., and Saito, Y. (2003). Brainstem and spinal projections of augmenting  
585 expiratory neurons in the rat. *Neurosci. Res.* 45, 41–51.
- 586 Feldman, J.L., and Del Negro, C.A. (2006). Looking for inspiration: new perspectives on  
587 respiratory rhythm. *Nat. Rev. Neurosci.* 7, 232–242.
- 588 Feldman, J.L., and Kam, K. (2015). Facing the challenge of mammalian neural microcircuits:  
589 taking a few breaths may help. *J. Physiol.* 593, 3–23.
- 590 Feldman, J.L., Negro, C.A.D., and Gray, P.A. (2013). Understanding the Rhythm of Breathing:  
591 So Near, Yet So Far. *Annu. Rev. Physiol.* 75, 423–452.
- 592 Funk, G.D., and Greer, J.J. (2013). The rhythmic, transverse medullary slice preparation in  
593 respiratory neurobiology: Contributions and caveats. *Respir. Physiol. Neurobiol.* 186, 236–253.
- 594 Funk, G.D., Smith, J.C., and Feldman, J.L. (1993). Generation and transmission of respiratory  
595 oscillations in medullary slices: role of excitatory amino acids. *J Neurophysiol* 70, 1497–1515.
- 596 Funk, G.D., Rajani, V., Alvares, T.S., Revill, A.L., Zhang, Y., Chu, N.Y., Biancardi, V., Linhares-  
597 Taxini, C., Katzell, A., and Reklow, R. (2015). Neuroglia and their roles in central respiratory  
598 control; an overview. *Comp. Biochem. Physiol. A. Mol. Integr. Physiol.* 186, 83–95.

- 599 Gaytán, S.P., Pásaro, R., Coulon, P., Bevengut, M., and Hilaire, G. (2002). Identification of  
600 central nervous system neurons innervating the respiratory muscles of the mouse: a  
601 transneuronal tracing study. *Brain Res. Bull.* *57*, 335–339.
- 602 Gray, P.A., Rekling, J.C., Bocchiaro, C.M., and Feldman, J.L. (1999). Modulation of respiratory  
603 frequency by peptidergic input to rhythmogenic neurons in the preBotzinger complex. *Science*  
604 *286*, 1566–1568.
- 605 Gray, P.A., Janczewski, W.A., Mellen, N., McCrimmon, D.R., and Feldman, J.L. (2001). Normal  
606 breathing requires preBotzinger complex neurokinin-1 receptor-expressing neurons. *Nat*  
607 *Neurosci* *4*, 927–930.
- 608 Gray, P.A., Hayes, J.A., Ling, G.Y., Llona, I., Tupal, S., Picardo, M.C.D., Ross, S.E., Hirata, T.,  
609 Corbin, J.G., Eugenín, J., et al. (2010). Developmental Origin of PreBötzing Complex  
610 Respiratory Neurons. *J. Neurosci.* *30*, 14883–14895.
- 611 Guerrier, C., Hayes, J.A., Fortin, G., and Holcman, D. (2015). Robust network oscillations during  
612 mammalian respiratory rhythm generation driven by synaptic dynamics. *Proc. Natl. Acad. Sci.*  
613 *112*, 9728–9733.
- 614 Huckstepp, R.T., Henderson, L.E., Cardoza, K.P., and Feldman, J.L. (2016). Interactions  
615 between respiratory oscillators in adult rats. *eLife* *5*, e14203.
- 616 Huckstepp, R.T.R., Cardoza, K.P., Henderson, L.E., and Feldman, J.L. (2015). Role of  
617 Parafacial Nuclei in Control of Breathing in Adult Rats. *J. Neurosci.* *35*, 1052–1067.
- 618 Hülsmann, S., Oku, Y., Zhang, W., and Richter, D.W. (2000). Metabolic coupling between glia  
619 and neurons is necessary for maintaining respiratory activity in transverse medullary slices of  
620 neonatal mouse. *Eur. J. Neurosci.* *12*, 856–862.
- 621 Huxtable, A.G., Zwicker, J.D., Alvares, T.S., Ruangkittisakul, A., Fang, X., Hahn, L.B., Chaves,  
622 E.P. de, Baker, G.B., Ballanyi, K., and Funk, G.D. (2010). Glia Contribute to the Purinergic  
623 Modulation of Inspiratory Rhythm-Generating Networks. *J. Neurosci.* *30*, 3947–3958.
- 624 Janczewski, W.A., Tashima, A., Hsu, P., Cui, Y., and Feldman, J.L. (2013). Role of Inhibition in  
625 Respiratory Pattern Generation. *J. Neurosci.* *33*, 5454–5465.
- 626 Kam, K., Worrell, J.W., Ventalon, C., Emiliani, V., and Feldman, J.L. (2013). Emergence of  
627 Population Bursts from Simultaneous Activation of Small Subsets of preBötzing Complex  
628 Inspiratory Neurons. *J. Neurosci.* *33*, 3332–3338.
- 629 Kleinlogel, S., Feldbauer, K., Dempfski, R.E., Fotis, H., Wood, P.G., Bamann, C., and Bamberg,  
630 E. (2011). Ultra light-sensitive and fast neuronal activation with the Ca<sup>2+</sup>-permeable  
631 channelrhodopsin CatCh. *Nat. Neurosci.* *14*, 513.
- 632 Koizumi, H., Mosher, B., Tariq, M.F., Zhang, R., Koshiya, N., and Smith, J.C. (2016). Voltage-  
633 Dependent Rhythmogenic Property of Respiratory Pre-Bötzing Complex Glutamatergic, Dbx1-  
634 Derived, and Somatostatin-Expressing Neuron Populations Revealed by Graded Optogenetic  
635 Inhibition. *Eneuro* *3*.



- 636 Kottick, A., and Del Negro, C.A. (2015). Synaptic Depression Influences Inspiratory-Expiratory  
637 Phase Transition in Dbx1 Interneurons of the preBötzing Complex in Neonatal Mice. *J.*  
638 *Neurosci. Off. J. Soc. Neurosci.* *35*, 11606–11611.
- 639 Kottick, A., Martin, C.A., and Del Negro, C.A. (2017). Fate mapping neurons and glia derived  
640 from Dbx1-expressing progenitors in mouse preBötzing complex. *Physiol. Rep.* *5*, e13300.
- 641 Kuwana, S., Tsunekawa, N., Yanagawa, Y., Okada, Y., Kuribayashi, J., and Obata, K. (2006).  
642 Electrophysiological and morphological characteristics of GABAergic respiratory neurons in the  
643 mouse pre-Bötzing complex. *Eur. J. Neurosci.* *23*, 667–674.
- 644 Marchenko, V., Koizumi, H., Mosher, B., Koshiya, N., Tariq, M.F., Bezdudnaya, T.G., Zhang, R.,  
645 Molkov, Y.I., Rybak, I.A., and Smith, J.C. (2016). Perturbations of Respiratory Rhythm and  
646 Pattern by Disrupting Synaptic Inhibition within Pre-Bötzing and Bötzing Complexes. *eNeuro*  
647 *ENEURO.0011-16.2016*.
- 648 Moore, J.D., Deschênes, M., Furuta, T., Huber, D., Smear, M.C., Demers, M., and Kleinfeld, D.  
649 (2013). Hierarchy of orofacial rhythms revealed through whisking and breathing. *Nature* *497*,  
650 205–210.
- 651 Morgado-Valle, C., Baca, S.M., and Feldman, J.L. (2010). Glycinergic pacemaker neurons in  
652 preBötzing Complex of neonatal mouse. *J. Neurosci. Off. J. Soc. Neurosci.* *30*, 3634–3639.
- 653 Mutolo, D., Bongiani, F., Carfi, M., and Pantaleo, T. (2002). Respiratory changes induced by  
654 kainic acid lesions in rostral ventral respiratory group of rabbits. *Am. J. Physiol. - Regul. Integr.*  
655 *Comp. Physiol.* *283*, R227–R242.
- 656 Pagliardini, S., Janczewski, W.A., Tan, W., Dickson, C.T., Deisseroth, K., and Feldman, J.L.  
657 (2011). Active Expiration Induced by Excitation of Ventral Medulla in Adult Anesthetized Rats. *J.*  
658 *Neurosci.* *31*, 2895–2905.
- 659 Pantaleo, T., Mutolo, D., Cinelli, E., and Bongiani, F. (2011). Respiratory responses to  
660 somatostatin microinjections into the Bötzing complex and the pre-Bötzing complex of the  
661 rabbit. *Neurosci. Lett.* *498*, 26–30.
- 662 Picardo, M.C.D., Weragalaarachchi, K.T.H., Akins, V.T., and Del Negro, C.A. (2013).  
663 Physiological and morphological properties of Dbx1-derived respiratory neurons in the pre-  
664 Bötzing complex of neonatal mice. *J. Physiol.* *591*, 2687–2703.
- 665 Rajani, V., Zhang, Y., Jalubula, V., Rancic, V., SheikhBahaei, S., Zwicker, J.D., Pagliardini, S.,  
666 Dickson, C.T., Ballanyi, K., Kasparov, S., et al. (2017). Release of ATP by pre-Bötzing  
667 complex astrocytes contributes to the hypoxic ventilatory response via a Ca<sup>2+</sup>-dependent  
668 P2Y1 receptor mechanism. *J. Physiol.*
- 669 Ramirez, J.-M., Dashevskiy, T., Marlin, I.A., and Baertsch, N. (2016). Microcircuits in respiratory  
670 rhythm generation: commonalities with other rhythm generating networks and evolutionary  
671 perspectives. *Curr. Opin. Neurobiol.* *41*, 53–61.
- 672 Revill, A.L., Vann, N.C., Akins, V.T., Kottick, A., Gray, P.A., Negro, C.A.D., and Funk, G.D.  
673 (2015). Dbx1 precursor cells are a source of inspiratory XII premotoneurons. *eLife* *4*, e12301.



- 674 Ruangkittisakul, A., Panaitescu, B., and Ballanyi, K. (2011). K<sup>+</sup> and Ca<sup>2+</sup> dependence of  
675 inspiratory-related rhythm in novel “calibrated” mouse brainstem slices. *Respir. Physiol.*  
676 *Neurobiol.* 175, 37–48.
- 677 Ruangkittisakul, A., Kottick, A., Picardo, M.C.D., Ballanyi, K., and Del Negro, C.A. (2014).  
678 Identification of the pre-Bötzinger complex inspiratory center in calibrated “sandwich” slices from  
679 newborn mice with fluorescent Dbx1 interneurons. *Physiol. Rep.* 2.
- 680 Schwarzacher, S.W., Smith, J.C., and Richter, D.W. (1995). Pre-Bötzinger complex in the cat. *J.*  
681 *Neurophysiol.* 73, 1452–1461.
- 682 Schwarzacher, S.W., Rüb, U., and Deller, T. (2010). Neuroanatomical characteristics of the  
683 human pre-Bötzinger complex and its involvement in neurodegenerative brainstem diseases.  
684 *Brain* awq327.
- 685 Smith, J.C., Ellenberger, H.H., Ballanyi, K., Richter, D.W., and Feldman, J.L. (1991). Pre-  
686 Botzinger complex: a brainstem region that may generate respiratory rhythm in mammals.  
687 *Science* 254, 726–729.
- 688 Song, H., Hayes, J.A., Vann, N.C., Wang, X., LaMar, M.D., and Negro, C.A.D. (2016).  
689 Functional Interactions between Mammalian Respiratory Rhythmogenic and Premotor Circuitry.  
690 *J. Neurosci.* 36, 7223–7233.
- 691 Stornetta, R.L., Rosin, D.L., Wang, H., Sevigny, C.P., Weston, M.C., and Guyenet, P.G.  
692 (2003a). A group of glutamatergic interneurons expressing high levels of both neurokinin-1  
693 receptors and somatostatin identifies the region of the pre-Bötzinger complex. *J. Comp. Neurol.*  
694 455, 499–512.
- 695 Stornetta, R.L., Sevigny, C.P., and Guyenet, P.G. (2003b). Inspiratory augmenting bulbospinal  
696 neurons express both glutamatergic and enkephalinergic phenotypes. *J. Comp. Neurol.* 455,  
697 113–124.
- 698 Tan, W., Janczewski, W.A., Yang, P., Shao, X.M., Callaway, E.M., and Feldman, J.L. (2008).  
699 Silencing preBötzinger Complex somatostatin-expressing neurons induces persistent apnea in  
700 awake rat. *Nat. Neurosci.* 11, 538–540.
- 701 Tanaka, I., Ezure, K., and Kondo, M. (2003). Distribution of glycine transporter 2 mRNA-  
702 containing neurons in relation to glutamic acid decarboxylase mRNA-containing neurons in rat  
703 medulla. *Neurosci. Res.* 47, 139–151.
- 704 Tupal, S., Rieger, M.A., Ling, G.-Y., Park, T.J., Dougherty, J.D., Goodchild, A.K., and Gray, P.A.  
705 (2014). Testing the role of preBötzinger Complex somatostatin neurons in respiratory and vocal  
706 behaviors. *Eur. J. Neurosci.* 40, 3067–3077.
- 707 Vann, N.C., Pham, F.D., Hayes, J.A., Kottick, A., and Negro, C.A.D. (2016). Transient  
708 Suppression of Dbx1 PreBötzinger Interneurons Disrupts Breathing in Adult Mice. *PLOS ONE*  
709 11, e0162418.
- 710 Wallen-Mackenzie, A., Gezelius, H., Thoby-Brisson, M., Nygard, A., Enjin, A., Fujiyama, F.,  
711 Fortin, G., and Kullander, K. (2006). Vesicular glutamate transporter 2 is required for central

- 712 respiratory rhythm generation but not for locomotor central pattern generation. *J Neurosci* 26,  
713 12294–12307.
- 714 Wang, X., Hayes, J.A., Reville, A.L., Song, H., Kottick, A., Vann, N.C., LaMar, M.D., Picardo,  
715 M.C.D., Akins, V.T., Funk, G.D., et al. (2014). Laser ablation of Dbx1 neurons in the pre-  
716 Bötzing complex stops inspiratory rhythm and impairs output in neonatal mice. *eLife* 3,  
717 e03427.
- 718 Wenninger, J.M., Pan, L.G., Klum, L., Leekley, T., Bastastic, J., Hodges, M.R., Feroah, T.R.,  
719 Davis, S., and Forster, H.V. (2004). Large lesions in the pre-Bötzing complex area eliminate  
720 eupneic respiratory rhythm in awake goats. *J. Appl. Physiol. Bethesda Md* 1985 97, 1629–1636.
- 721 Winter, S.M., Fresemann, J., Schnell, C., Oku, Y., Hirrlinger, J., and Hülsmann, S. (2009).  
722 Glycinergic interneurons are functionally integrated into the inspiratory network of mouse  
723 medullary slices. *Pflugers Arch.* 458, 459–469.
- 724 Wu, J., Capelli, P., Bouvier, J., Goulding, M., Arber, S., and Fortin, G. (2017). A V0 core  
725 neuronal circuit for inspiration. *Nat. Commun.* 8, 544.
- 726 Yackle, K., Schwarz, L.A., Kam, K., Sorokin, J.M., Huguenard, J.R., Feldman, J.L., Luo, L., and  
727 Krasnow, M.A. (2017). Breathing control center neurons that promote arousal in mice. *Science*  
728 355, 1411–1415.
- 729
- 730

731

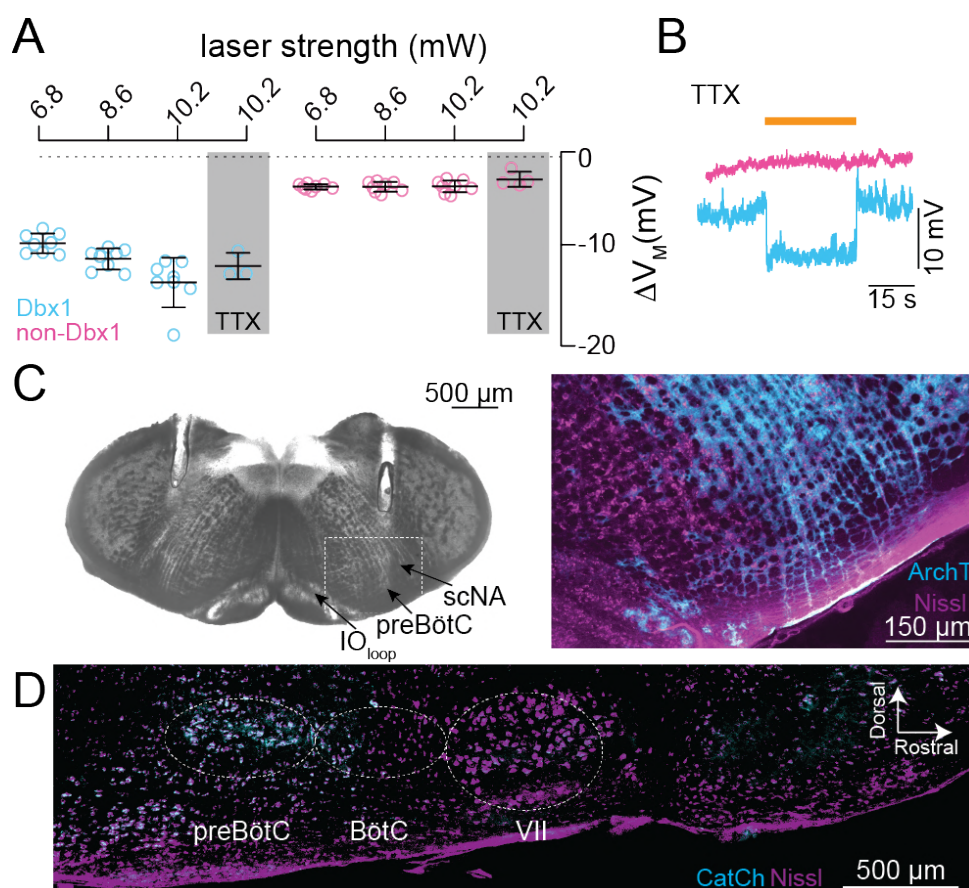

732 **Figure 1.** Photoinhibition of preBötC neurons *in vitro* and fusion protein expression patterns. **A**,  
 733 Membrane hyperpolarization ( $\Delta V_M$ ) evoked by light pulses at three intensities in Dbx1 and non-  
 734 Dbx1 preBötC neurons recorded from neonatal Dbx1;ArchT mouse slices. Bars show mean and  
 735 SD (n = 8 Dbx1 neurons in control and n = 4 Dbx1 neurons in 1  $\mu$ M tetrodotoxin [TTX]; n = 8  
 736 non-Dbx1 neurons in control and n = 4 non-Dbx1 neurons in TTX). **B**, Membrane trajectories in  
 737 response to 30-s bouts of 10.2 mW illumination in 1  $\mu$ M TTX. **C**, Bright field image of a  
 738 transverse section from an adult Dbx1;ArchT mouse at the level the preBötC, as indicated by  
 739 the loop of the inferior olive (IO<sub>loop</sub>) and the semi-compact division of the nucleus ambiguus  
 740 (scNA). Parallel tracks of implanted fiber optics are visible from the dorsal border of the tissue  
 741 section into the intermediate reticular formation dorsal to the preBötC. The selection box was  
 742 imaged using fluorescence microscopy to show ArchT (cyan) protein expression in the preBötC  
 743 in detail, Nissl staining (magenta) included for contrast. **D**, Parasagittal section from an adult  
 744 Dbx1;CatCh mouse. Nissl (magenta) shows anatomical landmarks including the facial (VII)  
 745 cranial nucleus, Bötzing complex (BötC), and the preBötC. CatCh (cyan) expression is limited  
 746 to the preBötC.

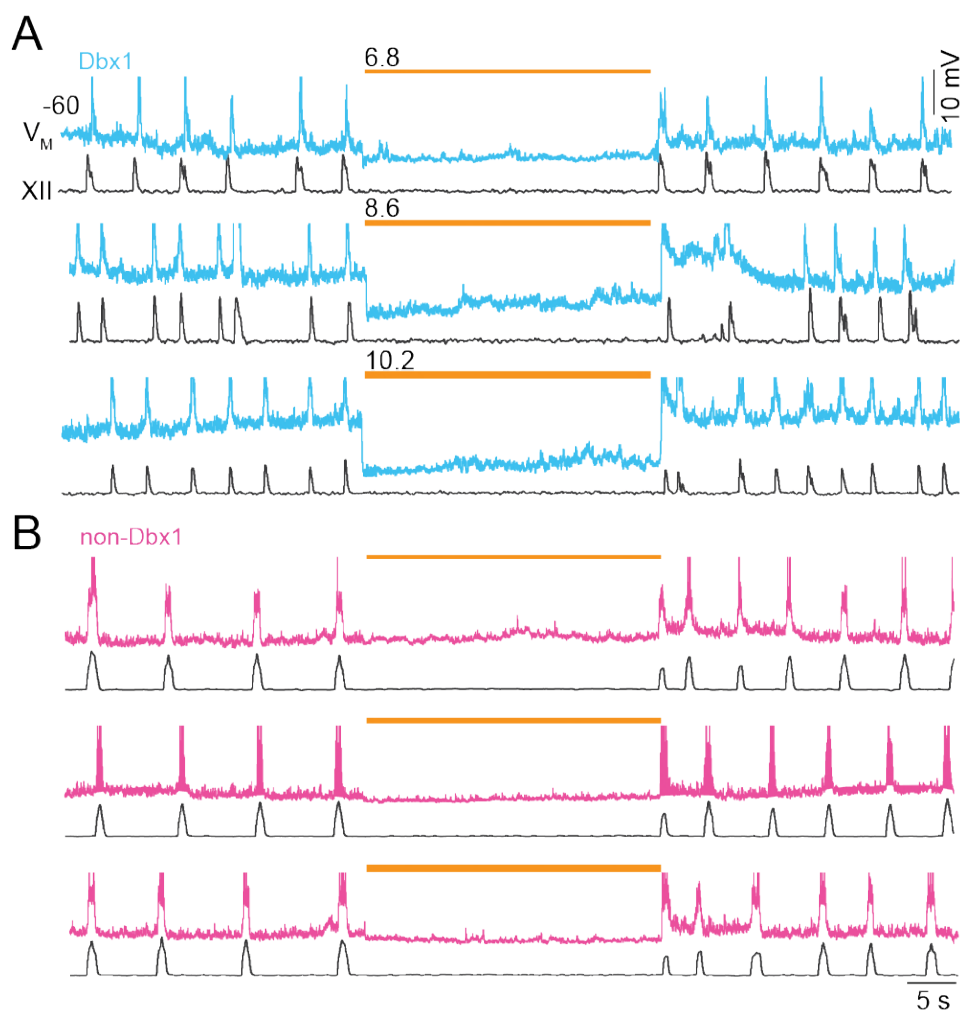

747 **Figure 1 – figure supplement 1.** Photoinhibition of preBötC neurons *in vitro*. **A**, Membrane  
748 trajectory of an ArchT-expressing Dbx1 preBötC neuron ( $V_M$ , cyan traces) in a rhythmically  
749 active slice preparation with inspiratory motor output recorded from the XII nerve rootlet. **B**,  
750 Membrane trajectory of a non-Dbx1, non-ArchT-expressing preBötC neuron ( $V_M$ , magenta  
751 traces) with XII motor output. Light pulses (30 s) were applied bilaterally to the preBötC at three  
752 intensities (units of mW) in A and B. Yellow line thickness corresponds to light intensity, which is  
753 also annotated above each line. Voltage and time calibrations apply to A and B, including  
754 baseline membrane potential of -60 mV. Action potentials have been truncated for display to  
755 emphasize the trajectory around the baseline membrane potential.

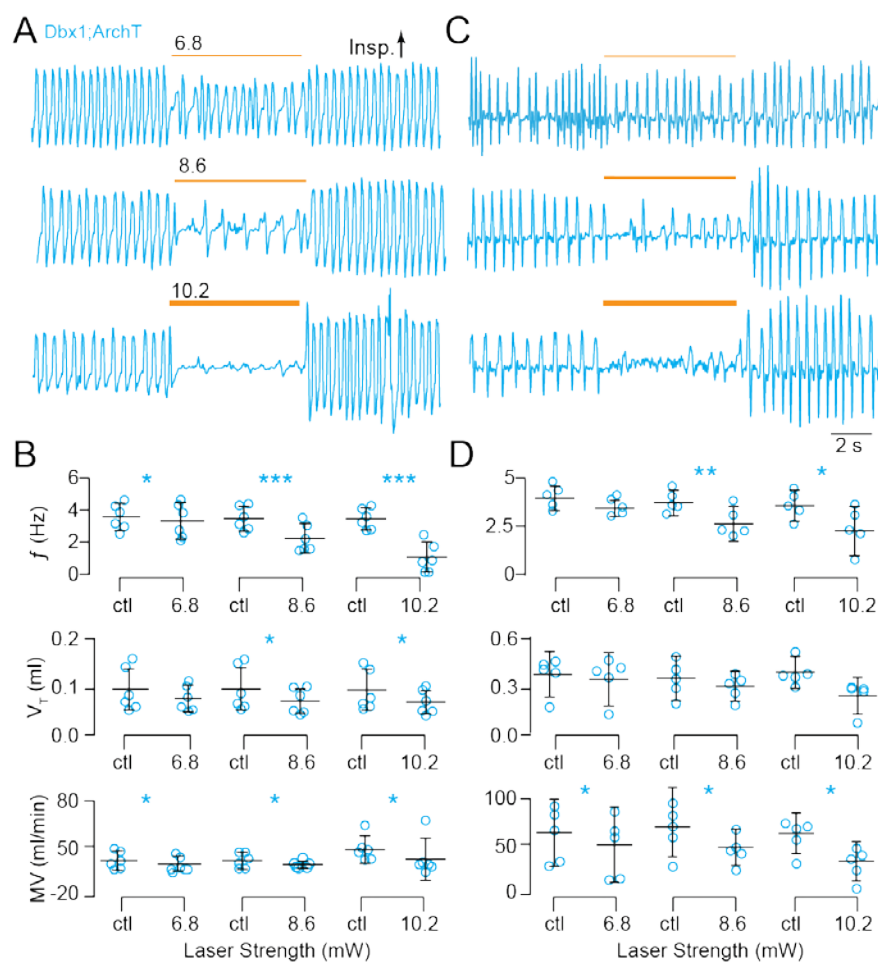

756

757 **Figure 2.** Photoinhibition of *Dbx1* preBötC neurons depresses breathing in adult *Dbx1;ArchT*  
 758 mice. **A**, Airflow traces from a sedated mouse exposed to 5-s bouts of bilateral preBötC  
 759 illumination at three intensities (units of mW). Yellow line thickness corresponds to light  
 760 intensity, which is also annotated above each line. **B**, Group data from experiments in **A**  
 761 quantifying light-evoked changes in  $f$ ,  $V_T$  and MV. Symbols show the mean  $f$ ,  $V_T$ , and MV  
 762 measured in each mouse. Bars show the mean and SD for all animals tested ( $n = 5$ ). Control  
 763 measurements are labeled 'ctl'; numerals indicate light intensity. **C**, Airflow traces from an  
 764 awake unrestrained mouse exposed to 5-s bouts of bilateral preBötC illumination at three  
 765 intensities. Yellow line thickness corresponds to light intensity; annotations match those in **A**. **D**,  
 766 Group data from experiments in **C** quantifying light-evoked changes in  $f$ ,  $V_T$  and MV. Symbols  
 767 show the mean  $f$ ,  $V_T$ , and MV measured in each mouse. Bars show the mean and SD for all  
 768 animals tested ( $n = 6$ ). Control measurements are labeled 'ctl'; numerals indicate light intensity.  
 769 Asterisks represent statistical significance at  $p < 0.05$ ; the double asterisk represents  $p < 0.01$ ;  
 770 and triple asterisks represent  $p < 0.001$ .

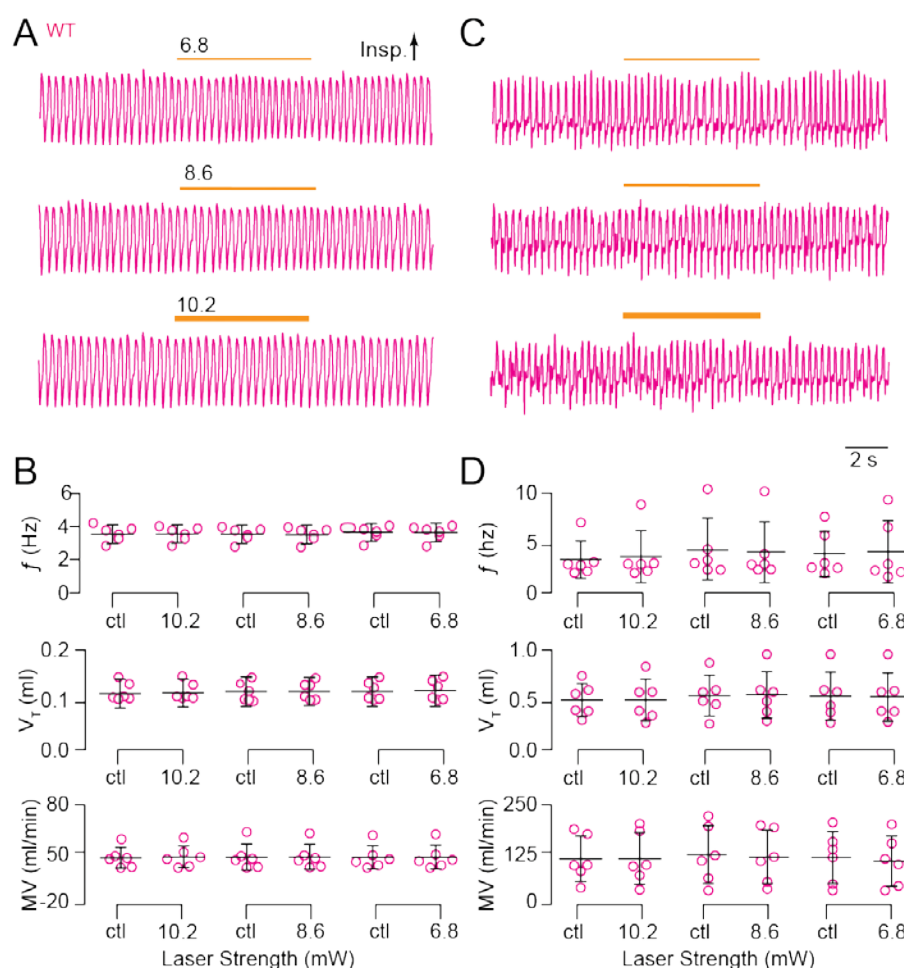

771

772 **Figure 2 – figure supplement 1.** Light application to the preBötC does not affect breathing in  
 773 wild type Dbx1;ArchT littermates. **A**, Airflow traces from a sedated mouse exposed to 5-s bouts  
 774 of bilateral preBötC illumination at three intensities (units of mW). Yellow line thickness  
 775 corresponds to light intensity, which is also annotated above each line. **B**, Group data from  
 776 experiments in A quantifying  $f$ ,  $V_T$  and MV in response to light application. Symbols show mean  
 777  $f$ ,  $V_T$ , and MV in each mouse. Bars show the mean and SD for all animals tested ( $n = 6$ ).  
 778 Control measurements are labeled 'ctl'; numerals indicate light intensity. **C**, Airflow traces from  
 779 an awake unrestrained mouse exposed to 5-s bouts of unilateral preBötC illumination at three  
 780 intensities (units of mW). Yellow line thickness corresponds to light intensity; annotations mach  
 781 those in A. **D**, Group data from experiments in C quantifying  $f$ ,  $V_T$  and MV in response to light  
 782 application. Symbols show mean  $f$ ,  $V_T$ , and MV in each mouse. Bars show the mean and SD for  
 783 all animals tested ( $n = 6$ ). Control measurements are labeled 'ctl'; numerals indicate light  
 784 intensity.

785



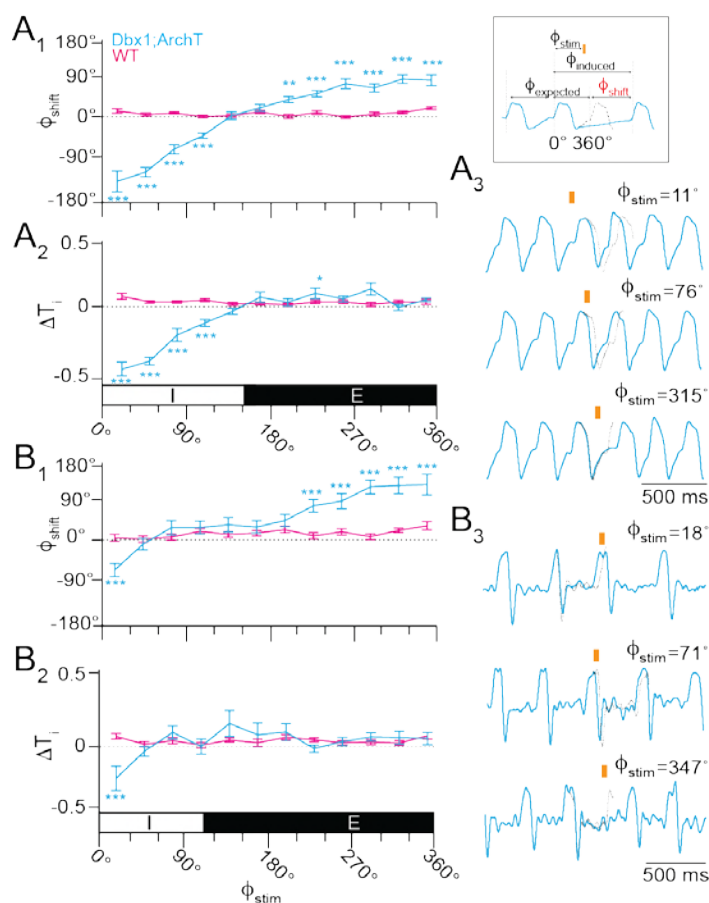

786

787 **Figure 3.** Effects of brief photoinhibition on the breathing phase and inspiratory duration in  
 788 Dbx1;ArchT mice (n = 6 in A, n = 5 in B, cyan) and wild type littermates (n = 6, magenta). **A<sub>1</sub>,**  
 789 Phase-response curve plotting  $\Phi_{\text{Shift}}$  following 100-ms photoinhibition at  $\Phi_{\text{Stim}}$  throughout the  
 790 breathing cycle in sedated mice.  $\Phi_{\text{Stim}}$  was partitioned into 12 equally sized bins (30°) in A and  
 791 B. **A<sub>2</sub>,** Phase-response curve showing changes in  $T_i$  following brief photoinhibition (i.e., the  
 792 perturbed breath) in the same cohort of sedated mice. The abscissa marks the inspiratory (I, 0-  
 793 150°) and expiratory (E, 150-360°) phases of the breathing cycle (0-360°), which applies to A<sub>1</sub>  
 794 and A<sub>2</sub>. **A<sub>3</sub>,** Sample airflow traces from a representative sedated mouse ( $\Phi_{\text{Stim}}$  is indicated by an  
 795 orange bar and numeral value). Time calibration is shown. **B<sub>1</sub>,** Phase-response curve plotting  
 796  $\Phi_{\text{Shift}}$  following brief photoinhibition at  $\Phi_{\text{Stim}}$  throughout the breathing cycle in awake unrestrained  
 797 mice. **B<sub>2</sub>,** Phase-response curve showing changes in  $T_i$  following brief photoinhibition (i.e., the  
 798 perturbed breath) in the same cohort of awake unrestrained mice. The abscissa marks the  
 799 inspiratory (I, 0-110°) and expiratory (E, 110-360°) phases of the breathing cycle (0-360°), which  
 800 applies to B<sub>1</sub> and B<sub>2</sub>. **B<sub>3</sub>,** Sample airflow traces from a representative awake unrestrained  
 801 mouse ( $\Phi_{\text{Stim}}$  is indicated by an orange bar and numeral value). Time calibration is shown.



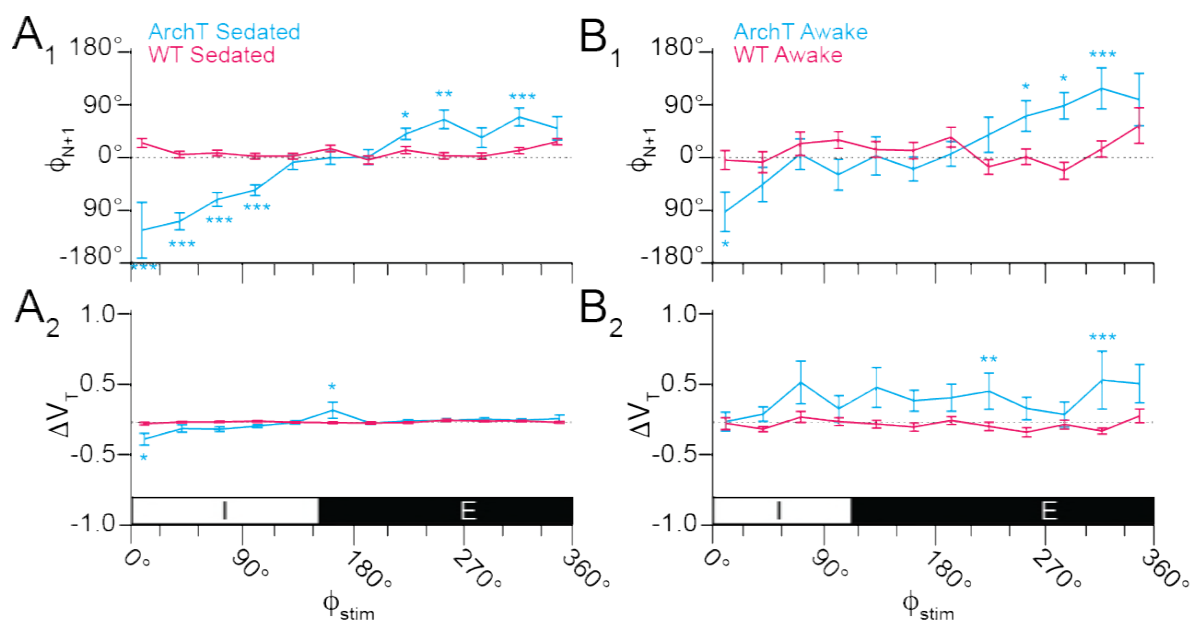

802

803 **Figure 3 – figure supplement 1.** Effects of brief photoinhibition on  $V_T$  and  $\Phi_{N+1}$  in Dbx1;ArchT  
 804 mice (n = 5 in A, n = 6 in B, cyan) and wild type littermates (n = 6, magenta). **A<sub>1</sub>**, Phase-  
 805 response curve plotting  $\Phi_{N+1}$  vs.  $\Phi_{stim}$  throughout the breathing cycle in sedated mice. **A<sub>2</sub>**,  
 806 Phase-response curve for changes in  $V_T$  following brief photoinhibition (i.e., the perturbed  
 807 breath) in the same cohort of sedated mice. The abscissa marks the inspiratory (I, 0-150°) and  
 808 expiratory (E, 150-360°) phases of the breathing cycle (0-360°), which applies to A<sub>1</sub> and A<sub>2</sub>. **B<sub>1</sub>**,  
 809 Phase-response curve plotting  $\Phi_{N+1}$  vs.  $\Phi_{stim}$  in awake unrestrained mice. **B<sub>2</sub>**, Phase-response  
 810 curve for  $\Delta V_T$  vs.  $\Phi_{stim}$  in the same cohort of awake unrestrained mice. The abscissa marks the  
 811 inspiratory (I, 0-110°) and expiratory (E, 110-360°) phases of the complete breathing cycle (0-  
 812 360°), which applies to B<sub>1</sub> and B<sub>2</sub>.

813

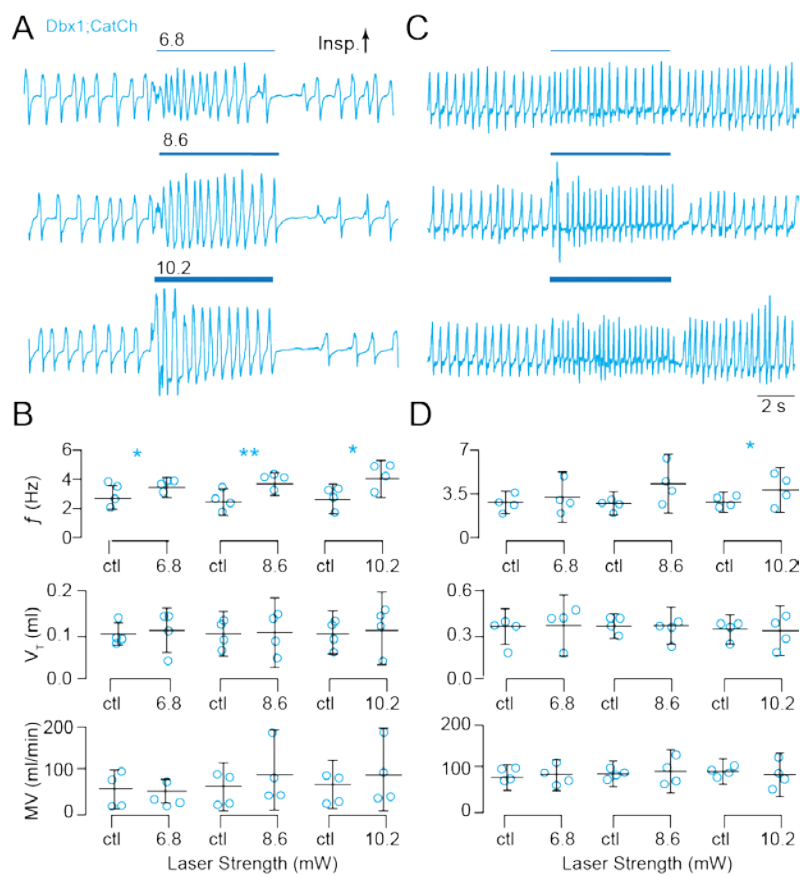

814

815 **Figure 4.** Photostimulation of Dbx1 preBötC neurons speeds-up breathing in adult Dbx1;CatCh  
 816 mice. **A**, Airflow traces from a sedated mouse exposed to 5-s bouts of unilateral preBötC  
 817 illumination at three intensities (units of mW). Cyan line thickness corresponds to light intensity,  
 818 which is also annotated above each line. **B**, Group data from experiments in A quantifying light-  
 819 evoked changes in  $f$ ,  $V_T$  and MV. Symbols show the mean  $f$ ,  $V_T$ , and MV measured in each  
 820 mouse. Bars show the mean and SD for all animals tested ( $n = 4$ ). Control measurements are  
 821 labeled 'ctl'; numerals indicate light intensity. **C**, Airflow traces from an awake unrestrained  
 822 mouse exposed to 5-s bouts of bilateral preBötC illumination at three intensities. Cyan line  
 823 thickness corresponds to light intensity; annotations match those in A. **D**, Group data from  
 824 experiments in C quantifying light-evoked changes in  $f$ ,  $V_T$  and MV. Symbols show the mean  $f$ ,  
 825  $V_T$ , and MV measured in each mouse. Bars show the mean and SD for all animals tested ( $n =$   
 826 4). Control measurements are labeled 'ctl'; numerals indicate light intensity. Asterisks represent  
 827 statistical significance at  $p < 0.05$ ; the double asterisk represents  $p < 0.01$ .

828

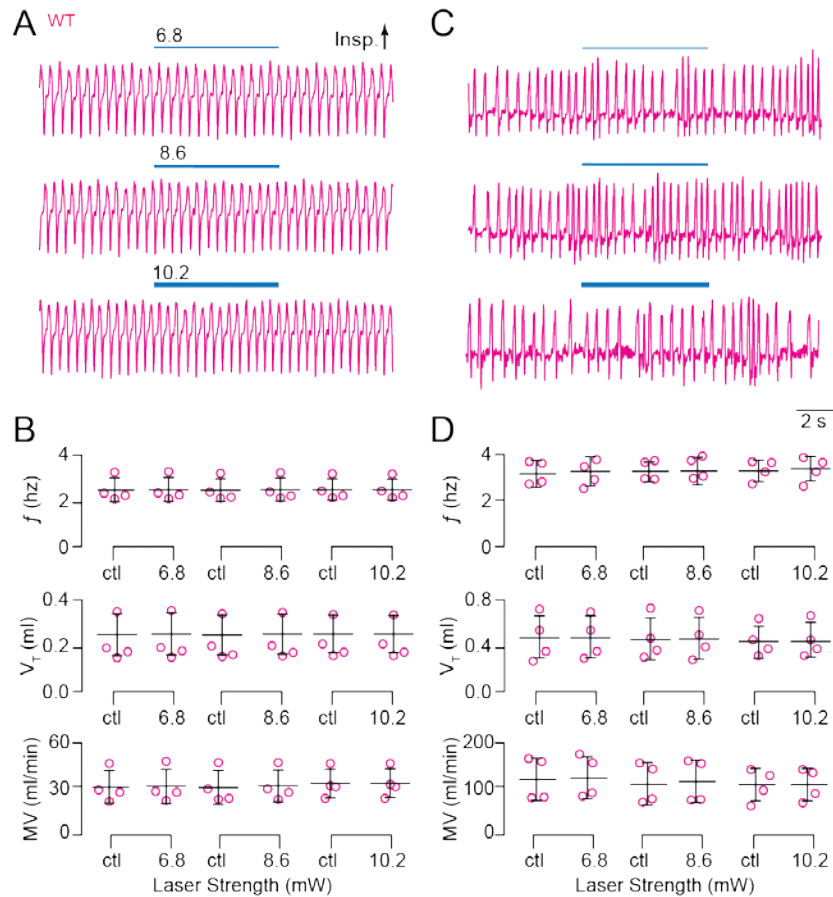

829

830 **Figure 4 – figure supplement 1.** Light application to the preBötC does not affect breathing in  
831 wild type Dbx1;CatCh littermates. **A**, Airflow traces from a sedated mouse exposed to 5-s bouts  
832 of unilateral preBötC illumination at three intensities (units of mW). Cyan line thickness  
833 corresponds to light intensity, which is also annotated above each line. **B**, Group data from  
834 experiments in A quantifying  $f$ ,  $V_T$  and MV in response to light application. Symbols show mean  
835  $f$ ,  $V_T$ , and MV in each mouse. Bars show the mean and SD for all animals tested ( $n = 4$ ).  
836 Control measurements are labeled 'ctl'. **C**, Traces from an awake unrestrained mouse exposed  
837 to 5-s bouts of unilateral preBötC illumination at three intensities. Cyan line thickness  
838 corresponds to light intensity; annotations match those in A. **D**, Group data from experiments in  
839 C quantifying  $f$ ,  $V_T$  and MV in response to light application. Symbols show mean  $f$ ,  $V_T$ , and MV  
840 in each mouse. Bars show the mean and SD for all animals tested ( $n = 6$ ). Control  
841 measurements are labeled 'ctl'; numerals indicate light intensity.

842

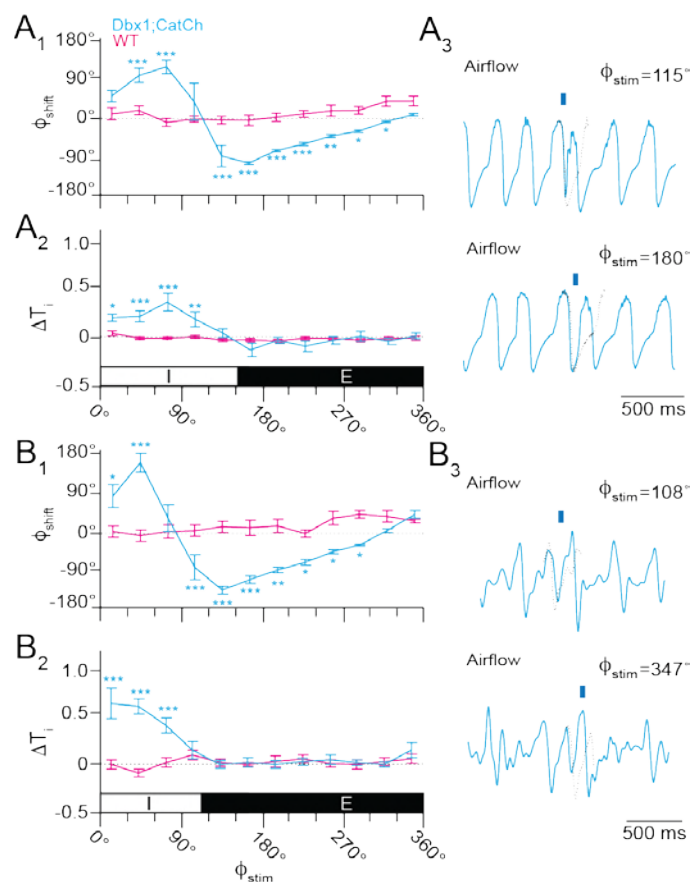

843

844 **Figure 5.** Effects of brief photostimulation on the breathing phase and inspiratory duration from  
845 Dbx1;CatCh mice ( $n = 4$ , cyan) and wild type littermates ( $n = 4$ , magenta). **A<sub>1</sub>**, Phase-response  
846 curve plotting  $\Phi_{\text{Shift}}$  following 100-ms photostimulation at  $\Phi_{\text{Stim}}$  throughout the breathing cycle in  
847 sedated mice.  $\Phi_{\text{Stim}}$  was partitioned into 12 equally sized bins ( $30^\circ$ ) in A and B. **A<sub>2</sub>**, Phase-  
848 response curve for changes in  $T_i$  following photostimulation (i.e., the perturbed breath) in the  
849 same cohort of sedated mice. The abscissa marks the inspiratory (I,  $0-150^\circ$ ) and expiratory (E,  
850  $150-360^\circ$ ) phases of the breathing cycle ( $0-360^\circ$ ), which applies to **A<sub>1</sub>** and **A<sub>2</sub>**. **A<sub>3</sub>**, Sample airflow  
851 traces from a representative sedated mouse ( $\Phi_{\text{Stim}}$  is indicated by an orange bar and numeral  
852 value). Time calibration as shown. **B<sub>1</sub>**, Phase-response curve plotting  $\Phi_{\text{Shift}}$  following brief  
853 photostimulation at  $\Phi_{\text{Stim}}$  throughout the breathing cycle in awake unrestrained mice. **B<sub>2</sub>**, Phase-  
854 response curve for changes in  $T_i$  following brief photostimulation (i.e., the perturbed breath) in  
855 the same cohort of awake unrestrained mice. The abscissa marks the inspiratory (I,  $0-110^\circ$ ) and  
856 expiratory (E,  $110-360^\circ$ ) phases of the complete breathing cycle ( $0-360^\circ$ ), which applies to **B<sub>1</sub>**  
857 and **B<sub>2</sub>**. **B<sub>3</sub>**, Sample airflow traces from a representative awake unrestrained mouse ( $\Phi_{\text{Stim}}$  is  
858 indicated by an orange bar and numeral value). Time calibration is shown.

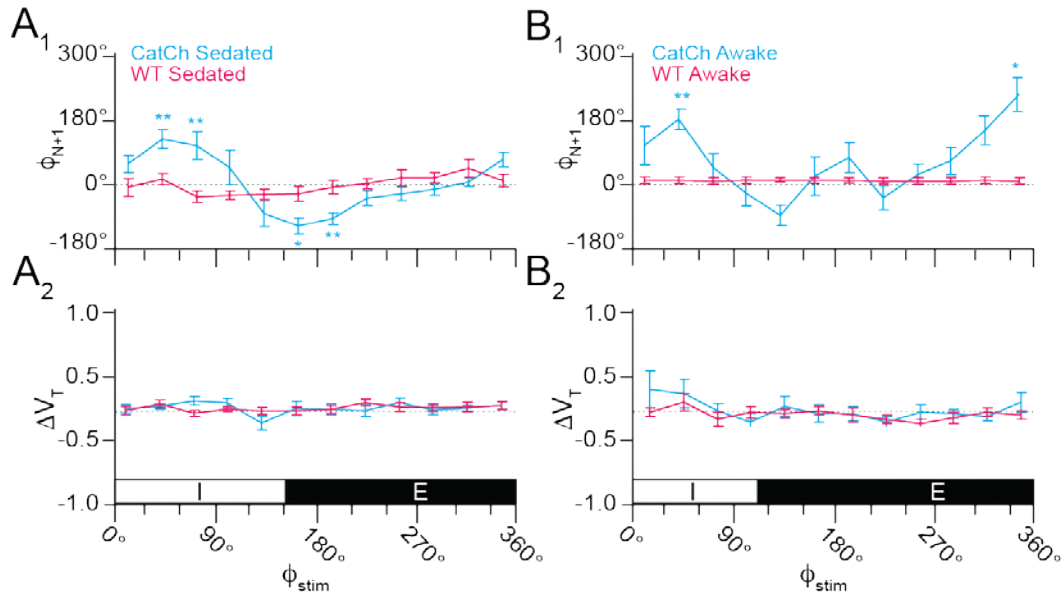

859

860 **Figure 5 – figure supplement 1.** Effects of brief photostimulation on  $V_T$  and  $\Phi_{N+1}$  in  
861 *Dbx1;CatCh* mice ( $n = 4$ , cyan) or wild type littermates ( $n = 4$ , magenta). **A<sub>1</sub>**, Phase-response  
862 curve plotting  $\Phi_{N+1}$  vs.  $\Phi_{Stim}$  throughout the breathing cycle in sedated mice. **A<sub>2</sub>**, Phase-  
863 response curve for changes in  $V_T$  following photostimulation (i.e., the perturbed breath) in the  
864 same cohort of sedated mice ( $n = 4$ ). The abscissa marks the inspiratory (I, 0-150°) and  
865 expiratory (E, 150-360°) phases of the breathing cycle (0-360°), which applies to **A<sub>1</sub>** and **A<sub>2</sub>**. **B<sub>1</sub>**,  
866 Phase-response curve plotting  $\Phi_{N+1}$  vs.  $\Phi_{Stim}$  in awake unrestrained mice. **B<sub>2</sub>**, Phase-response  
867 curve for  $\Delta V_T$  vs.  $\Phi_{Stim}$  in the same cohort of awake unrestrained mice. The abscissa marks the  
868 inspiratory (I, 0-110°) and expiratory (E, 110-360°) phases of the complete breathing cycle (0-  
869 360°), which applies to **B<sub>1</sub>** and **B<sub>2</sub>**.

870
